# Supplementary material for: Turn-on fluorogenic sensors based on an anthraquinone signaling unit for the detection of Zn(ii) and Cd(ii) ions
Source: Royal Society of Chemistry journal article supplement (doi:10.1039/d3ob01223a), 2023-01-01
Supplement: d3ob01223a1.pdf [file d3ob01223a1.pdf]

## Supplementary Information

Turn-on Fluorogenic Sensors Based on An Anthraquinone Signaling Unit for The Detection of  
Zn(II) and Cd(II) ions

Chawanakorn Kongsak<sup>a,b</sup>, Natthiti Chiangraeng<sup>a</sup>, Puracheth Rithchumpon<sup>a</sup>,  
Piyarat Nimmanpipug<sup>a,c</sup>, Puttinan Meepowpan<sup>a,c</sup>, Thawatchai Tuntulani<sup>d</sup>,  
and Praput Thavornnyutikarn<sup>\*a,c</sup>

*<sup>a</sup> Department of Chemistry, Faculty of Science, Chiang Mai University, 239 Huay Kaew Rd.  
Chiang Mai 50200, Thailand*

*<sup>b</sup> Graduate School, Chiang Mai University, 239 Huay Kaew Rd. Chiang Mai 50200, Thailand*

*<sup>c</sup> Center of Excellence in Materials Science and Technology, Chiang Mai University, Chiang Mai  
50200, Thailand*

*<sup>d</sup> Department of Chemistry, Faculty of Science, Chulalongkorn University, Phayathai Road,  
Patumwan Bangkok 10330, Thailand*

Email: praput.th@cmu.ac.th

## Table of contents

|                 |                                                                                                                                                                                                         |    |
|-----------------|---------------------------------------------------------------------------------------------------------------------------------------------------------------------------------------------------------|----|
| <b>Table S1</b> | Selected distances between the metal (M = Zn(II) or Cd(II)) atom and the chelating atoms of the chemosensor <b>1</b> in angstrom (Å).....                                                               | 5  |
| <b>Table S2</b> | Atomic coordinates for structures at a stationary point.....                                                                                                                                            | 6  |
| <b>Table S3</b> | Data of Zn(II) and Cd(II) ions solutions and their corresponding mole ratios in titration experiments with chemosensor <b>1</b> .....                                                                   | 13 |
| <b>Table S4</b> | Data regarding ligand-to-metal ratios and their relevant amounts of metal ion solution (Zn(II) and Cd(II)) used in titration experiments for both UV-vis and fluorescence spectroscopic techniques..... | 13 |
| <b>Table S5</b> | Fluorescence titration data of <b>1</b> -Zn(II) used for the Benesi–Hildebrand plot.....                                                                                                                | 14 |
| <b>Table S6</b> | Fluorescence titration data of <b>1</b> -Cd(II) used for the Benesi–Hildebrand plot.....                                                                                                                | 14 |
| <b>SI 1</b>     | Determination of the overall binding constants ( $\beta_{12}$ ).....                                                                                                                                    | 15 |
| <b>SI 2</b>     | Full and partial $^1\text{H}$ NMR spectrum of 1,8-diaminoanthraquinone ( <b>4</b> ) in DMSO- $d_6$ (400 MHz).....                                                                                       | 16 |
| <b>SI 3</b>     | $^{13}\text{C}$ NMR spectrum of 1,8-diaminoanthraquinone ( <b>4</b> ) in DMSO- $d_6$ (100 MHz).....                                                                                                     | 16 |
| <b>SI 4</b>     | COSY $^1\text{H}$ - $^1\text{H}$ spectrum of 1,8-diaminoanthraquinone ( <b>4</b> ) in DMSO- $d_6$ (400 MHz).....                                                                                        | 17 |
| <b>SI 5</b>     | HMQC $^1\text{H}$ - $^{13}\text{C}$ spectrum of 1,8-diaminoanthraquinone ( <b>4</b> ) in DMSO- $d_6$ (400 MHz and 100 MHz for $^1\text{H}$ and $^{13}\text{C}$ NMR, respectively).....                  | 17 |
| <b>SI 6</b>     | MALDI-TOF mass spectrum of 1,8-diaminoanthraquinone ( <b>4</b> ) (Found = 238.146 m/z $[\text{M}]^+$ ).....                                                                                             | 18 |
| <b>SI 7</b>     | Full and partial $^1\text{H}$ NMR spectra of <i>N,N'</i> -(9,10-dioxo-9,10-dihydroanthracene-1,8-diyl) <i>bis</i> (2-chloroacetamide) ( <b>6</b> ) in DMSO- $d_6$ (500 MHz).....                        | 18 |
| <b>SI 8</b>     | ESI high resolution mass spectrum of <i>N,N'</i> -(9,10-dioxo-9,10-dihydroanthracene-1,8-diyl) <i>bis</i> (2-chloroacetamide) ( <b>6</b> ) (Found = 413.0077 m/z $[\text{M} + \text{Na}^+]$ ).....      | 19 |
| <b>SI 9</b>     | FTIR spectrum of <i>N,N'</i> -(9,10-dioxo-9,10-dihydroanthracene-1,8-diyl) <i>bis</i> (2-chloroacetamide) ( <b>6</b> ).....                                                                             | 19 |
| <b>SI 10</b>    | $^1\text{H}$ NMR spectrum of <i>bis</i> (pyridin-2-ylmethyl)amine ( <b>9</b> ) in DMSO- $d_6$ (400 MHz).....                                                                                            | 20 |

|              |                                                                                                                                                                                                                                                                                                            |    |
|--------------|------------------------------------------------------------------------------------------------------------------------------------------------------------------------------------------------------------------------------------------------------------------------------------------------------------|----|
| <b>SI 11</b> | <sup>13</sup> C NMR spectrum of <i>bis</i> (pyridin-2-ylmethyl)amine ( <b>9</b> ) in DMSO- <i>d</i> <sub>6</sub> (100 MHz).....                                                                                                                                                                            | 20 |
| <b>SI 12</b> | DEPT-90 and 135 spectra comparing to <sup>13</sup> C-NMR spectrum of <i>bis</i> (pyridin-2-ylmethyl)amine ( <b>9</b> ) in DMSO- <i>d</i> <sub>6</sub> (100 MHz).....                                                                                                                                       | 21 |
| <b>SI 13</b> | COSY <sup>1</sup> H- <sup>1</sup> H spectrum of <i>bis</i> (pyridin-2-ylmethyl)amine ( <b>9</b> ) in DMSO- <i>d</i> <sub>6</sub> (400 MHz)....                                                                                                                                                             | 21 |
| <b>SI 14</b> | HMQC <sup>1</sup> H- <sup>13</sup> C spectrum of <i>bis</i> (pyridin-2-ylmethyl)amine ( <b>9</b> ) in DMSO- <i>d</i> <sub>6</sub> (400 MHz and 100 MHz for <sup>1</sup> H and <sup>13</sup> C NMR, respectively).....                                                                                      | 22 |
| <b>SI 15</b> | Full and partial <sup>1</sup> H NMR spectrum of <i>N,N'</i> -(9,10-dioxo-9,10-dihydroanthracene-1,8-diyl) <i>bis</i> (2-( <i>bis</i> (pyridin-2-ylmethyl)amino)acetamide) ( <b>1</b> ) in DMSO- <i>d</i> <sub>6</sub> (400 MHz).....                                                                       | 22 |
| <b>SI 16</b> | <sup>13</sup> C NMR spectrum of <i>N,N'</i> -(9,10-dioxo-9,10-dihydroanthracene-1,8-diyl) <i>bis</i> (2-( <i>bis</i> (pyridin-2-ylmethyl)amino)acetamide) ( <b>1</b> ) in DMSO- <i>d</i> <sub>6</sub> (100 MHz).....                                                                                       | 23 |
| <b>SI 17</b> | DEPT-90 and 135 spectra comparing to <sup>13</sup> C NMR spectrum of <i>N,N'</i> -(9,10-dioxo-9,10-dihydroanthracene-1,8-diyl) <i>bis</i> (2-( <i>bis</i> (pyridin-2-ylmethyl)amino)acetamide) ( <b>1</b> ) in DMSO- <i>d</i> <sub>6</sub> (100 MHz).....                                                  | 23 |
| <b>SI 18</b> | COSY <sup>1</sup> H- <sup>1</sup> H spectrum of <i>N,N'</i> -(9,10-dioxo-9,10-dihydroanthracene-1,8-diyl) <i>bis</i> (2-( <i>bis</i> (pyridin-2-ylmethyl)amino)acetamide) ( <b>1</b> ) in DMSO- <i>d</i> <sub>6</sub> (400 MHz).....                                                                       | 24 |
| <b>SI 19</b> | HMQC <sup>1</sup> H- <sup>13</sup> C spectrum of <i>N,N'</i> -(9,10-dioxo-9,10-dihydroanthracene-1,8-diyl) <i>bis</i> (2-( <i>bis</i> (pyridin-2-ylmethyl)amino)acetamide) ( <b>1</b> ) in DMSO- <i>d</i> <sub>6</sub> (400 MHz and 100 MHz for <sup>1</sup> H and <sup>13</sup> C NMR, respectively)..... | 24 |
| <b>SI 20</b> | ESI high resolution mass spectrum of <i>N,N'</i> -(9,10-dioxo-9,10-dihydroanthracene-1,8-diyl) <i>bis</i> (2-( <i>bis</i> (pyridin-2-ylmethyl)amino)acetamide) ( <b>1</b> ) (Found = 717.2934 m/z [M + H] <sup>+</sup> ).....                                                                              | 25 |
| <b>SI 21</b> | FTIR spectrum of <i>N,N'</i> -(9,10-dioxo-9,10-dihydroanthracene-1,8-diyl) <i>bis</i> (2-( <i>bis</i> (pyridin-2-ylmethyl)amino)acetamide) ( <b>1</b> ).....                                                                                                                                               | 25 |
| <b>SI 22</b> | <sup>1</sup> H NMR spectrum of <i>N,N'</i> -(9,10-dioxo-9,10-dihydroanthracene-2,6-diyl) <i>bis</i> (2-chloroacetamide) ( <b>11</b> ) in DMSO- <i>d</i> <sub>6</sub> (500 MHz).....                                                                                                                        | 26 |
| <b>SI 23</b> | <sup>13</sup> C NMR spectrum of <i>N,N'</i> -(9,10-dioxo-9,10-dihydroanthracene-2,6-diyl) <i>bis</i> (2-chloroacetamide) ( <b>11</b> ) in DMSO- <i>d</i> <sub>6</sub> (125 MHz).....                                                                                                                       | 26 |
| <b>SI 24</b> | DEPT-90 and 135 spectra comparing to <sup>13</sup> C-NMR spectrum of <i>N,N'</i> -(9,10-dioxo-9,10-dihydroanthracene-2,6-diyl) <i>bis</i> (2-chloroacetamide) ( <b>11</b> ) in DMSO- <i>d</i> <sub>6</sub> (125 MHz).....                                                                                  | 27 |
| <b>SI 25</b> | COSY <sup>1</sup> H- <sup>1</sup> H spectrum of <i>N,N'</i> -(9,10-dioxo-9,10-dihydroanthracene-2,6-diyl) <i>bis</i> (2-chloroacetamide) ( <b>11</b> ) in DMSO- <i>d</i> <sub>6</sub> (500 MHz).....                                                                                                       | 27 |

|                   |                                                                                                                                                                                                                                                                                                            |    |
|-------------------|------------------------------------------------------------------------------------------------------------------------------------------------------------------------------------------------------------------------------------------------------------------------------------------------------------|----|
| <b>SI 26</b>      | HMQC <sup>1</sup> H– <sup>13</sup> C spectrum of <i>N,N'</i> -(9,10-dioxo-9,10-dihydroanthracene-2,6-diyl) <i>bis</i> (2-chloro acetamide) ( <b>11</b> ) in DMSO- <i>d</i> <sub>6</sub> (500 MHz and 125 MHz for <sup>1</sup> H and <sup>13</sup> C NMR, respectively).....                                | 28 |
| <b>SI 27</b>      | ESI high resolution mass spectrum of <i>N,N'</i> -(9,10-dioxo-9,10-dihydroanthracene-2,6-diyl) <i>bis</i> (2-chloro acetamide) ( <b>11</b> ) (Found = 391.0250 m/z ([M+H] <sup>+</sup> )).....                                                                                                             | 28 |
| <b>SI 28</b>      | ATR-FTIR spectrum of <i>N,N'</i> -(9,10-dioxo-9,10-dihydroanthracene-2,6-diyl) <i>bis</i> (2-chloro acetamide) ( <b>11</b> ).....                                                                                                                                                                          | 29 |
| <b>SI 29</b>      | <sup>1</sup> H NMR spectrum of <i>N,N'</i> -(9,10-dioxo-9,10-dihydroanthracene-2,6-diyl) <i>bis</i> (2-( <i>bis</i> (pyridin-2-ylmethyl)amino)acetamide) ( <b>2</b> ) in DMSO- <i>d</i> <sub>6</sub> (500 MHz).....                                                                                        | 29 |
| <b>SI 30</b>      | <sup>13</sup> C NMR spectrum of <i>N,N'</i> -(9,10-dioxo-9,10-dihydroanthracene-2,6-diyl) <i>bis</i> (2-( <i>bis</i> (pyridin-2-ylmethyl)amino)acetamide) ( <b>2</b> ) in DMSO- <i>d</i> <sub>6</sub> (125 MHz).....                                                                                       | 30 |
| <b>SI 31</b>      | DEPT-90 and 135 spectra comparing to <sup>13</sup> C-NMR spectrum of <i>N,N'</i> -(9,10-dioxo-9,10-dihydroanthracene-2,6-diyl) <i>bis</i> (2-( <i>bis</i> (pyridin-2-ylmethyl)amino)acetamide) ( <b>2</b> ) in DMSO- <i>d</i> <sub>6</sub> (125 MHz).....                                                  | 30 |
| <b>SI 32</b>      | COSY <sup>1</sup> H– <sup>1</sup> H spectrum of <i>N,N'</i> -(9,10-dioxo-9,10-dihydroanthracene-2,6-diyl) <i>bis</i> (2-( <i>bis</i> (pyridin-2-ylmethyl)amino)acetamide) ( <b>2</b> ) in DMSO- <i>d</i> <sub>6</sub> (500 MHz).....                                                                       | 31 |
| <b>SI 33</b>      | HMQC <sup>1</sup> H– <sup>13</sup> C spectrum of <i>N,N'</i> -(9,10-dioxo-9,10-dihydroanthracene-2,6-diyl) <i>bis</i> (2-( <i>bis</i> (pyridin-2-ylmethyl)amino)acetamide) ( <b>2</b> ) in DMSO- <i>d</i> <sub>6</sub> (500 MHz and 125 MHz for <sup>1</sup> H and <sup>13</sup> C NMR, respectively)..... | 31 |
| <b>SI 34</b>      | ESI high resolution mass of <i>N,N'</i> -(9,10-dioxo-9,10-dihydroanthracene-2,6-diyl) <i>bis</i> (2-( <i>bis</i> (pyridin-2-ylmethyl)amino)acetamide) ( <b>2</b> ) (Found = 717.2933 m/z [M+H] <sup>+</sup> ).....                                                                                         | 32 |
| <b>SI 35</b>      | ATR-FTIR spectrum of <i>N,N'</i> -(9,10-dioxo-9,10-dihydroanthracene-2,6-diyl) <i>bis</i> (2-( <i>bis</i> (pyridin-2-ylmethyl)amino)acetamide) ( <b>2</b> ).....                                                                                                                                           | 32 |
| <b>References</b> | .....                                                                                                                                                                                                                                                                                                      | 32 |

To investigate the stability of **1**-Zn(II) and **1**-Cd(II) complexes, the distances between each metal and linkers from the chemosensor were evaluated and shown in **Table S1**, where the notations are depicted in **Fig. 10a** and **10b** for **1**-Zn(II) and **1**-Cd(II) complexes, respectively. After the optimization, we found that the distance in the **1**-Zn(II) complex is less than the **1**-Cd(II) complex, indicating that the Zn(II) favorably interact with the chemosensor **1**. This finding is also consistent with our experiment as already described in sections of fluorescence titration of Zn(II) and Cd(II) ions with chemosensor **1** with the most stable metal complexes for the chemosensor **1** and their corresponding fluorescent spectra *via* computational approach. Moreover, the distance values from calculations are in the range of bond lengths reported in the previous literature.<sup>1</sup>

**Table S1** Selected distances between the metal (**M** = Zn(II) or Cd(II)) atom and the chelating atoms of the chemosensor **1** in angstrom (Å).

| Atom pair               | <b>M</b> and chelating atom distance (Å) |                  |
|-------------------------|------------------------------------------|------------------|
|                         | <b>1</b> -Zn(II)                         | <b>1</b> -Cd(II) |
| <b>M1</b> ··· <b>N1</b> | 2.16                                     | 2.41             |
| <b>M1</b> ··· <b>N2</b> | 2.25                                     | 2.47             |
| <b>M1</b> ··· <b>N3</b> | 2.15                                     | 2.40             |
| <b>M1</b> ··· <b>O1</b> | 2.11                                     | 2.37             |
| <b>M2</b> ··· <b>N4</b> | 2.13                                     | 2.40             |
| <b>M2</b> ··· <b>N5</b> | 2.25                                     | 2.50             |
| <b>M2</b> ··· <b>N6</b> | 2.11                                     | 2.37             |
| <b>M2</b> ··· <b>O2</b> | 2.17                                     | 2.52             |

**Table S2** Atomic coordinates for structures at a stationary point

|   | Chemosensor 1 |            |            |
|---|---------------|------------|------------|
| C | 3.4403760     | 3.9366000  | -1.3042720 |
| C | 2.2971510     | 4.6047270  | -0.8785470 |
| C | 3.4990200     | 2.5545190  | -1.2499520 |
| C | 1.1970860     | 3.8740500  | -0.4446510 |
| C | 2.4291130     | 1.7915840  | -0.7468910 |
| C | -2.2971120    | 4.6047030  | 0.8787580  |
| C | 0.0000160     | 4.6386530  | 0.0000960  |
| C | 1.2208840     | 2.4611540  | -0.3928640 |
| C | -3.4403310    | 3.9365650  | 1.3044840  |
| C | -1.1970470    | 3.8740360  | 0.4448400  |
| C | 0.0000260     | 1.7130090  | 0.0000810  |
| C | -3.4989700    | 2.5544850  | 1.2501380  |
| C | -1.2208400    | 2.4611400  | 0.3930320  |
| C | -2.4290680    | 1.7915660  | 0.7470520  |
| C | -3.6106960    | -0.4404590 | 0.3924440  |
| C | -4.8077770    | 0.1234530  | -0.3785870 |
| C | -6.1809530    | -2.3640800 | -4.7283790 |
| C | -6.1132390    | -0.9759690 | -4.7232970 |
| C | -6.5412720    | -3.0093030 | -3.5457090 |
| C | -6.4002830    | -0.2980010 | -3.5407740 |
| C | -6.7443640    | -1.0300170 | -2.4016780 |
| C | -7.0756900    | -0.3434470 | -1.0923100 |
| C | -6.5400730    | -0.1948920 | 1.2802420  |
| C | -7.5804900    | -1.1583840 | 1.8142420  |
| C | -8.0134740    | -3.2372030 | 2.6838590  |
| C | -9.3762650    | -2.9708210 | 2.8120990  |
| C | -9.8395250    | -1.7200530 | 2.4212920  |
| C | -8.9262540    | -0.7980710 | 1.9155000  |
| C | 3.6108070     | -0.4404120 | -0.3923420 |
| C | 4.8078360     | 0.1235300  | 0.3787560  |
| C | 6.1810590     | -2.3647360 | 4.7281240  |
| C | 6.1133950     | -0.9766220 | 4.7233410  |
| C | 6.5413150     | -3.0097190 | 3.5453040  |
| C | 6.4004340     | -0.2984080 | 3.5409560  |
| C | 6.7444610     | -1.0301930 | 2.4016950  |
| C | 7.0757690     | -0.3433600 | 1.0924560  |
| C | 6.5401810     | -0.1945610 | -1.2801100 |
| C | 7.5804010     | -1.1581530 | -1.8143260 |
| C | 8.0129080     | -3.2367960 | -2.6846110 |
| C | 9.3757890     | -2.9707530 | -2.8125960 |

|   |             |            |            |
|---|-------------|------------|------------|
| C | 9.8393510   | -1.7202480 | -2.4213090 |
| C | 8.9262780   | -0.7981820 | -1.9153120 |
| H | 4.2838270   | 4.4922460  | -1.6963540 |
| H | 2.2301830   | 5.6839030  | -0.8958320 |
| H | 4.3706590   | 2.0438000  | -1.6336520 |
| H | -2.2301480  | 5.6838790  | 0.8960570  |
| H | -4.2837780  | 4.4922020  | 1.6965890  |
| H | -4.3706000  | 2.0437530  | 1.6338450  |
| H | -1.6481950  | -0.0874400 | 0.7027850  |
| H | -4.5580830  | -0.0894450 | -1.4239060 |
| H | -4.8785740  | 1.2172510  | -0.3011620 |
| H | -5.9663680  | -2.9379420 | -5.6216380 |
| H | -5.8420530  | -0.4296170 | -5.6194950 |
| H | -6.6133810  | -4.0930360 | -3.5140490 |
| H | -6.3595740  | 0.7844660  | -3.4991600 |
| H | -8.0068860  | -0.7766420 | -0.7235580 |
| H | -7.2592180  | 0.7312030  | -1.2745630 |
| H | -6.9409130  | 0.8345410  | 1.3078160  |
| H | -5.6878160  | -0.2391670 | 1.9620730  |
| H | -7.6128620  | -4.2002670 | 2.9883580  |
| H | -10.0459510 | -3.7226940 | 3.2115490  |
| H | -10.8896180 | -1.4648090 | 2.5070870  |
| H | -9.2506600  | 0.1878960  | 1.6029730  |
| H | 1.6482720   | -0.0874430 | -0.7026190 |
| H | 4.5581500   | -0.0894730 | 1.4240580  |
| H | 4.8785530   | 1.2173380  | 0.3014260  |
| H | 5.9664740   | -2.9387840 | 5.6212640  |
| H | 5.8422480   | -0.4304540 | 5.6196630  |
| H | 6.6133700   | -4.0934490 | 3.5134050  |
| H | 6.3597360   | 0.7840690  | 3.4995710  |
| H | 8.0070000   | -0.7764310 | 0.7236290  |
| H | 7.2592320   | 0.7312670  | 1.2749060  |
| H | 6.9411840   | 0.8348120  | -1.3075460 |
| H | 5.6878860   | -0.2385990 | -1.9619080 |
| H | 7.6120610   | -4.1996420 | -2.9894910 |
| H | 10.0453110  | -3.7226760 | -3.2122260 |
| H | 10.8895240  | -1.4652660 | -2.5069010 |
| H | 9.2509220   | 0.1875930  | -1.6024310 |
| N | -7.1297090  | -2.3605740 | 2.2026570  |
| N | -6.8208930  | -2.3696960 | -2.4081780 |
| N | -2.5370340  | 0.4044230  | 0.6757770  |
| N | -6.0547310  | -0.5520750 | -0.0589410 |
| N | 7.1293320   | -2.3600850 | -2.2032100 |

|   |            |            |            |
|---|------------|------------|------------|
| N | 6.8209290  | -2.3698780 | 2.4079040  |
| N | 2.5370970  | 0.4044400  | -0.6756070 |
| N | 6.0548370  | -0.5518740 | 0.0590470  |
| O | 0.0000040  | 5.8606000  | 0.0000870  |
| O | 0.0000370  | 0.4743470  | 0.0000760  |
| O | -3.4996200 | -1.6265800 | 0.6211580  |
| O | 3.4997940  | -1.6265280 | -0.6211160 |

Chemosensor 1-Cd(II) complex

|   |            |            |            |
|---|------------|------------|------------|
| C | -3.3974120 | 4.8133150  | 1.5895240  |
| C | -2.3305900 | 5.4554620  | 0.9929350  |
| C | -3.4513160 | 3.4123490  | 1.6010230  |
| C | -1.2620550 | 4.7201590  | 0.4582140  |
| C | -2.4528350 | 2.6540990  | 1.0108260  |
| C | 2.0571140  | 5.3788490  | -1.2713990 |
| C | -0.1633650 | 5.4577310  | -0.1511490 |
| C | -1.2678560 | 3.2895090  | 0.4949940  |
| C | 3.1661120  | 4.7141760  | -1.7655320 |
| C | 0.9980950  | 4.6669110  | -0.6324730 |
| C | -0.1124720 | 2.5362430  | 0.0742790  |
| C | 3.2893340  | 3.3442400  | -1.5609270 |
| C | 1.0504100  | 3.2881570  | -0.4753370 |
| C | 2.2980880  | 2.6321900  | -0.8581000 |
| C | 3.5244230  | 0.4828440  | -0.2959250 |
| C | 4.8944140  | 1.0499490  | 0.0586000  |
| C | 6.7056110  | -1.0859910 | 4.6589660  |
| C | 7.4101660  | 0.0932580  | 4.4388820  |
| C | 6.1447740  | -1.7335530 | 3.5669920  |
| C | 7.5295870  | 0.5764890  | 3.1396000  |
| C | 6.9499410  | -0.1335900 | 2.0915260  |
| C | 7.1404450  | 0.3253970  | 0.6570240  |
| C | 6.3171910  | 0.0425250  | -1.6393450 |
| C | 7.0147860  | -1.2327850 | -2.0735960 |
| C | 7.1149220  | -3.5503710 | -2.0022560 |
| C | 8.1019690  | -3.5918660 | -2.9764000 |
| C | 8.5645160  | -2.3891180 | -3.5002270 |
| C | 8.0161430  | -1.1956490 | -3.0400060 |
| C | -3.5561600 | 0.4286240  | 0.5753130  |
| C | -4.8697510 | 0.9920160  | 0.0270210  |
| C | -6.0439580 | -1.3500000 | -4.6771570 |
| C | -6.8177330 | -0.1951280 | -4.6088760 |
| C | -5.5957050 | -1.9136590 | -3.4914500 |



---

|    |            |            |            |
|----|------------|------------|------------|
| C  | -7.1139100 | 0.3473760  | -3.3628710 |
| C  | -6.6411490 | -0.2826560 | -2.2140180 |
| C  | -7.0261180 | 0.2357710  | -0.8397680 |
| C  | -6.5293460 | 0.0525630  | 1.5500930  |
| C  | -7.2676880 | -1.2178210 | 1.9348470  |
| C  | -7.3720040 | -3.5349120 | 1.9020890  |
| C  | -8.4635760 | -3.5524570 | 2.7587800  |
| C  | -8.9743870 | -2.3372500 | 3.2036600  |
| C  | -8.3716580 | -1.1565270 | 2.7821500  |
| Cd | 5.2209400  | -2.2361260 | 0.3748230  |
| Cd | -5.0802530 | -2.2326150 | -0.1913290 |
| H  | -4.1961660 | 5.3827040  | 2.0496380  |
| H  | -2.2817710 | 6.5359280  | 0.9438770  |
| H  | -4.2748890 | 2.9225510  | 2.1033590  |
| H  | 1.9428140  | 6.4493890  | -1.3801110 |
| H  | 3.9352540  | 5.2507390  | -2.3065430 |
| H  | 4.1370110  | 2.8206520  | -1.9765990 |
| H  | 1.5123390  | 0.8882690  | -0.2578440 |
| H  | 4.8412160  | 1.2411650  | 1.1364010  |
| H  | 5.0987550  | 2.0148970  | -0.4053460 |
| H  | 6.5854750  | -1.4975900 | 5.6530870  |
| H  | 7.8571950  | 0.6327990  | 5.2656100  |
| H  | 5.5831260  | -2.6514840 | 3.6926840  |
| H  | 8.0695340  | 1.4937030  | 2.9364230  |
| H  | 7.9778990  | -0.2322300 | 0.2289070  |
| H  | 7.4258410  | 1.3823720  | 0.6397140  |
| H  | 6.9270150  | 0.9106850  | -1.9108860 |
| H  | 5.3889130  | 0.1157400  | -2.2147320 |
| H  | 6.7343390  | -4.4610130 | -1.5550830 |
| H  | 8.5004040  | -4.5439240 | -3.3032820 |
| H  | 9.3441760  | -2.3775730 | -4.2528770 |
| H  | 8.3582250  | -0.2445000 | -3.4295220 |
| H  | -1.6359010 | 0.7796330  | 0.9439740  |
| H  | -4.6871590 | 1.1451770  | -1.0414620 |
| H  | -5.1230140 | 1.9689370  | 0.4357040  |
| H  | -5.7861350 | -1.8044600 | -5.6254390 |
| H  | -7.1816580 | 0.2802060  | -5.5123520 |
| H  | -4.9829380 | -2.8078430 | -3.4929670 |
| H  | -7.7085740 | 1.2489540  | -3.2777950 |
| H  | -7.9135360 | -0.3106780 | -0.5074900 |
| H  | -7.3163230 | 1.2899970  | -0.9088880 |
| H  | -7.1852660 | 0.9176450  | 1.6993670  |
| H  | -5.6929710 | 0.1698390  | 2.2455910  |

---

|   |            |            |            |
|---|------------|------------|------------|
| H | -6.9498580 | -4.4567190 | 1.5195280  |
| H | -8.9021100 | -4.4958920 | 3.0583870  |
| H | -9.8334290 | -2.3069590 | 3.8638850  |
| H | -8.7517370 | -0.1953620 | 3.1070840  |
| N | 6.5797900  | -2.3995410 | -1.5628070 |
| N | 6.2662390  | -1.2719380 | 2.3120710  |
| N | 2.4340870  | 1.3125050  | -0.5071180 |
| N | 5.9606680  | 0.0761240  | -0.2020200 |
| N | -6.7837920 | -2.3965070 | 1.5016000  |
| N | -5.8903820 | -1.3963160 | -2.2874520 |
| N | -2.5476490 | 1.2412090  | 0.9556400  |
| N | -5.9764280 | 0.0336090  | 0.1799570  |
| O | -0.1622670 | 6.6864070  | -0.2902780 |
| O | -0.0500180 | 1.2656920  | 0.1587620  |
| O | 3.3059610  | -0.7232670 | -0.2537760 |
| O | -3.3572720 | -0.8002600 | 0.5747990  |

Chemosensor **1**-Zn(II) complex

|   |            |            |            |
|---|------------|------------|------------|
| C | -3.4712920 | 4.9019850  | 1.2478830  |
| C | -2.4145340 | 5.5111480  | 0.6001050  |
| C | -3.4832190 | 3.5082580  | 1.4040290  |
| C | -1.3187270 | 4.7578650  | 0.1524940  |
| C | -2.4520030 | 2.7278550  | 0.9102630  |
| C | 1.9719490  | 5.3079550  | -1.6725480 |
| C | -0.2343680 | 5.4577830  | -0.5247790 |
| C | -1.2828760 | 3.3401090  | 0.3389360  |
| C | 3.0844060  | 4.6160890  | -2.1255390 |
| C | 0.9412440  | 4.6461330  | -0.9379380 |
| C | -0.1044830 | 2.5805920  | 0.0097610  |
| C | 3.2424560  | 3.2780310  | -1.7864260 |
| C | 1.0304610  | 3.2945200  | -0.6384950 |
| C | 2.2853610  | 2.6279080  | -0.9821040 |
| C | 3.5198650  | 0.5461900  | -0.2225950 |
| C | 4.9677140  | 1.0244520  | -0.1617890 |
| C | 7.1245930  | -1.1097730 | 4.4482250  |
| C | 8.0145760  | -0.1173700 | 4.0463690  |
| C | 6.2617810  | -1.6457850 | 3.5056470  |
| C | 8.0158230  | 0.2965620  | 2.7183670  |
| C | 7.1331800  | -0.2954210 | 1.8215980  |
| C | 7.1726070  | 0.0532270  | 0.3450590  |
| C | 6.0041200  | -0.5305840 | -1.7480070 |
| C | 6.1968420  | -2.0255520 | -1.9271380 |

---

|   |            |            |            |
|---|------------|------------|------------|
| C | 5.7019870  | -4.1783550 | -1.1909240 |
| C | 6.3383750  | -4.7497490 | -2.2807370 |
| C | 6.9364980  | -3.9097100 | -3.2161160 |
| C | 6.8673330  | -2.5322060 | -3.0353460 |
| C | -3.4855500 | 0.4569560  | 0.6680460  |
| C | -4.7689290 | 0.9335910  | -0.0140350 |
| C | -4.6301990 | -2.5520790 | -4.1128760 |
| C | -5.4748350 | -1.5321170 | -4.5429120 |
| C | -4.4520460 | -2.7315710 | -2.7500850 |
| C | -6.1097350 | -0.7318970 | -3.5985790 |
| C | -5.8928050 | -0.9753320 | -2.2465550 |
| C | -6.6195290 | -0.1831850 | -1.1754550 |
| C | -6.6814570 | 0.0808740  | 1.2720590  |
| C | -7.3031210 | -1.2270060 | 1.7287110  |
| C | -7.0703290 | -3.5297720 | 1.9819040  |
| C | -8.2768050 | -3.6269570 | 2.6573050  |
| C | -9.0190760 | -2.4667630 | 2.8597910  |
| C | -8.5286670 | -1.2540030 | 2.3858930  |
| H | -4.2926100 | 5.4912200  | 1.6375210  |
| H | -2.3970420 | 6.5820470  | 0.4414230  |
| H | -4.2977880 | 3.0421780  | 1.9437520  |
| H | 1.8314840  | 6.3584490  | -1.8908700 |
| H | 3.8262870  | 5.1091440  | -2.7404380 |
| H | 4.0871620  | 2.7288460  | -2.1749390 |
| H | 1.5320490  | 0.9771730  | -0.1349090 |
| H | 5.0952280  | 1.4407490  | 0.8437500  |
| H | 5.2033720  | 1.8271340  | -0.8567840 |
| H | 7.0908890  | -1.4591230 | 5.4721020  |
| H | 8.6968280  | 0.3320330  | 4.7581680  |
| H | 5.5432970  | -2.4107430 | 3.7721210  |
| H | 8.6953370  | 1.0679650  | 2.3768280  |
| H | 7.8840280  | -0.6215650 | -0.1380040 |
| H | 7.5558730  | 1.0674490  | 0.2031820  |
| H | 6.8140380  | 0.0208340  | -2.2327210 |
| H | 5.0853540  | -0.2533750 | -2.2725080 |
| H | 5.2362090  | -4.7874760 | -0.4264460 |
| H | 6.3732280  | -5.8265860 | -2.3833900 |
| H | 7.4553530  | -4.3213390 | -4.0737790 |
| H | 7.3266390  | -1.8563240 | -3.7462950 |
| H | -1.5935680 | 0.8714050  | 1.1051880  |
| H | -4.4937210 | 1.0704380  | -1.0640300 |
| H | -5.1149650 | 1.9025480  | 0.3370370  |
| H | -4.1159410 | -3.1951000 | -4.8155120 |

---

---

|    |            |            |            |
|----|------------|------------|------------|
| H  | -5.6348480 | -1.3583430 | -5.6005040 |
| H  | -3.8019240 | -3.5068000 | -2.3625480 |
| H  | -6.7695980 | 0.0709420  | -3.9038550 |
| H  | -7.5519150 | -0.7031820 | -0.9400310 |
| H  | -6.8976030 | 0.8056330  | -1.5535270 |
| H  | -7.4567020 | 0.8359030  | 1.1103120  |
| H  | -6.0476060 | 0.4476260  | 2.0839990  |
| H  | -6.4614950 | -4.4043540 | 1.7880800  |
| H  | -8.6257040 | -4.5903190 | 3.0064430  |
| H  | -9.9720390 | -2.5054190 | 3.3743650  |
| H  | -9.0888850 | -0.3373980 | 2.5250250  |
| N  | 5.6309810  | -2.8452490 | -1.0193730 |
| N  | 6.2679790  | -1.2481280 | 2.2204290  |
| N  | 2.4474980  | 1.3602760  | -0.4807870 |
| N  | 5.8643830  | -0.1310300 | -0.3255260 |
| N  | -6.5949610 | -2.3557060 | 1.5313950  |
| N  | -5.0700870 | -1.9607340 | -1.8379180 |
| N  | -2.5098170 | 1.3117540  | 1.0082380  |
| N  | -5.8300980 | -0.0861170 | 0.0731350  |
| O  | -0.2565940 | 6.6662570  | -0.7797880 |
| O  | -0.0017830 | 1.3326120  | 0.2547610  |
| O  | 3.2552900  | -0.6210850 | 0.0918080  |
| O  | -3.2845070 | -0.7701380 | 0.8086250  |
| Zn | 4.9060920  | -1.8841570 | 0.7106930  |
| Zn | -4.8487130 | -2.0940520 | 0.2917270  |

---

**Table S3** Data of Zn(II) and Cd(II) ions solutions and their corresponding mole ratios in titration experiments with chemosensor **1**

| Chemical formula                                      | Weight (g) | Mole                    | Stock volume (mL) | Concentration (M)       | Mole equivalence per 10 $\mu$ L |
|-------------------------------------------------------|------------|-------------------------|-------------------|-------------------------|---------------------------------|
| Zn(ClO <sub>4</sub> ) <sub>2</sub> ·6H <sub>2</sub> O | 0.047544   | 1.2767×10 <sup>-4</sup> | 50                | 2.5534×10 <sup>-3</sup> | 0.2                             |
| Cd(ClO <sub>4</sub> ) <sub>2</sub> ·xH <sub>2</sub> O | 0.020690   | 6.6461×10 <sup>-5</sup> | 25                | 2.6580×10 <sup>-3</sup> | 0.2                             |

**Table S4** Data regarding ligand-to-metal ratios and their relevant amounts of metal ion solution (Zn(II) and Cd(II)) used in titration experiments for both UV-vis and fluorescence spectroscopic techniques

| Ligand : Metal ratio | Amount of ligand (mL) | Amount of metal ion solution ( $\mu$ L) |
|----------------------|-----------------------|-----------------------------------------|
| 1 : 0.0              | 2.5                   | 0                                       |
| 1 : 0.2              |                       | 10                                      |
| 1 : 0.4              |                       | 20                                      |
| 1 : 0.6              |                       | 30                                      |
| 1 : 0.8              |                       | 40                                      |
| 1 : 1.0              |                       | 50                                      |
| 1 : 1.1              |                       | 55                                      |
| 1 : 1.2              |                       | 60                                      |
| 1 : 1.3              |                       | 65                                      |
| 1 : 1.4              |                       | 70                                      |
| 1 : 1.5              |                       | 75                                      |
| 1 : 1.6              |                       | 80                                      |
| 1 : 1.7              |                       | 85                                      |
| 1 : 1.8              |                       | 90                                      |
| 1 : 1.9              |                       | 95                                      |
| 1 : 2.0              |                       | 100                                     |
| 1 : 3.0              |                       | 150                                     |
| 1 : 4.0              |                       | 200                                     |
| 1 : 5.0              | 250                   |                                         |

The calculation of the binding constants of both **1**-Zn(II) and **1**-Cd(II) complexes utilized the data of fluorescence titration experiments, then used the Benesi–Hildebrand method model for a ligand-to-metal ratio of 1:2. The results used for the plots were described in **Table S4** and **S5** for Zn(II) and Cd(II) ion, respectively.

**Table S5.** Fluorescence titration data of **1**-Zn(II) used for the Benesi–Hildebrand plot

| Ratio of metal ions | $[\text{Zn(II)}]_{\text{f}}$<br>( $\times 10^{-5}$ M) | $[\text{Zn(II)}]_{\text{f}}^2$<br>( $\times 10^{-10}$ M <sup>2</sup> ) | $1/[\text{Zn(II)}]_{\text{f}}^2$<br>( $\times 10^8$ M <sup>-2</sup> ) | $F-F_0$ | $1/(F-F_0)$ |
|---------------------|-------------------------------------------------------|------------------------------------------------------------------------|-----------------------------------------------------------------------|---------|-------------|
| 0.2                 | 1.017                                                 | 1.035                                                                  | 96.63                                                                 | 31.75   | 0.03150     |
| 0.4                 | 2.027                                                 | 4.107                                                                  | 24.35                                                                 | 80.40   | 0.01244     |
| 0.6                 | 3.028                                                 | 9.167                                                                  | 10.91                                                                 | 134.5   | 0.007435    |
| 0.8                 | 4.021                                                 | 16.17                                                                  | 6.185                                                                 | 175.1   | 0.005711    |
| 1.0                 | 5.007                                                 | 25.07                                                                  | 3.989                                                                 | 219.1   | 0.004564    |
| 1.1                 | 5.486                                                 | 30.09                                                                  | 3.323                                                                 | 268.2   | 0.003728    |
| 1.2                 | 5.961                                                 | 35.54                                                                  | 2.814                                                                 | 345.3   | 0.002896    |
| 1.3                 | 6.433                                                 | 41.38                                                                  | 2.416                                                                 | 404.8   | 0.002470    |
| 1.4                 | 6.901                                                 | 47.62                                                                  | 2.100                                                                 | 444.1   | 0.002252    |
| 1.5                 | 7.366                                                 | 54.25                                                                  | 1.843                                                                 | 424.3   | 0.002357    |

**Table S6.** Fluorescence titration data of **1**-Cd(II) used for the Benesi–Hildebrand plot

| Ratio of metal ions | $[\text{Cd(II)}]_{\text{f}}$<br>( $\times 10^{-5}$ M) | $[\text{Cd(II)}]_{\text{f}}^2$<br>( $\times 10^{-10}$ M <sup>2</sup> ) | $1/[\text{Cd(II)}]_{\text{f}}^2$<br>( $\times 10^8$ M <sup>-2</sup> ) | $F-F_0$ | $1/(F-F_0)$ |
|---------------------|-------------------------------------------------------|------------------------------------------------------------------------|-----------------------------------------------------------------------|---------|-------------|
| 0.2                 | 1.059                                                 | 1.121                                                                  | 89.17                                                                 | 30.98   | 0.03228     |
| 0.4                 | 2.110                                                 | 4.450                                                                  | 22.47                                                                 | 94.76   | 0.01055     |
| 0.6                 | 3.152                                                 | 9.934                                                                  | 10.07                                                                 | 170.8   | 0.005854    |
| 0.8                 | 4.186                                                 | 17.52                                                                  | 5.707                                                                 | 253.1   | 0.003951    |
| 1.0                 | 5.212                                                 | 27.16                                                                  | 3.682                                                                 | 339.1   | 0.002949    |
| 1.1                 | 5.711                                                 | 32.61                                                                  | 3.067                                                                 | 379.2   | 0.002637    |
| 1.2                 | 6.206                                                 | 38.51                                                                  | 2.597                                                                 | 422.4   | 0.002367    |
| 1.3                 | 6.697                                                 | 44.84                                                                  | 2.230                                                                 | 467.0   | 0.002128    |
| 1.4                 | 7.184                                                 | 51.61                                                                  | 1.938                                                                 | 518.4   | 0.001929    |
| 1.5                 | 7.667                                                 | 58.79                                                                  | 1.701                                                                 | 562.1   | 0.001779    |

\*  $[\text{M(II)}]_{\text{f}}$  is the final concentration of metal ion M at the total volume of solution in a cuvette containing both chemosensor **1** at fixed concentrations and added metal ion solution,  $F$  is the fluorescence intensity at 520 nm as a function related to the metal ion concentration and  $F_0$  the fluorescence intensity of pure chemosensor **1** at 520 nm.

### SI 1 Determination of the overall binding constants ( $\beta_{12}$ )

The overall binding constant ( $\beta_{12}$ ) was determined by linear fitting of the fluorescence titration curve (**Fig. 9a** and **9b**) using **Equation 1**. Due to the binding model of chemosensor **1** might bind with metal ions in the ratio of 1:2 (ligand : metal), so the binding constant might be  $K_{12}$  or  $\beta_{12}$  which is related to the binding of first metal ion and second metal ions.

$$\text{Equation 1: } \beta_{12} = \text{intercept} / \text{slope}$$

For the **1**-Zn(II) binding constant, the intercept value is  $0.00284 \pm (4.55229 \times 10^{-4})$ , while its slope is  $3.03643 \times 10^{-12} \pm (1.42987 \times 10^{-13})$ . These results can be calculated into the overall binding constant ( $\beta_{12}$ ) of  $9.3531 \times 10^8$ .

For the **1**-Cd(II) binding constant, the intercept value is  $0.0017 \pm (1.98115 \times 10^{-4})$ , while its slope is  $3.46472 \times 10^{-12} \pm (6.74307 \times 10^{-14})$ . These results can be calculated into the overall binding constant ( $\beta_{12}$ ) of  $4.9066 \times 10^8$ .

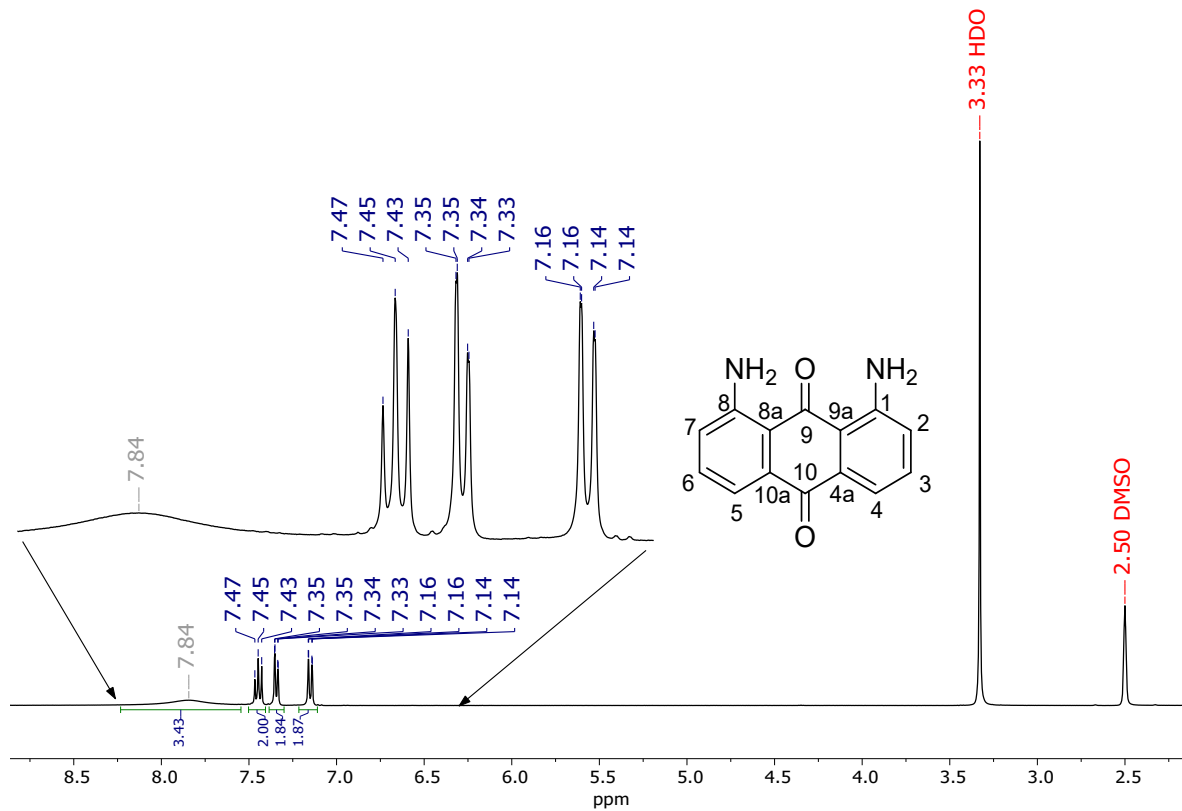

SI 2 Full and partial  $^1\text{H}$  NMR spectrum of 1,8-diaminoanthraquinone (**4**) in  $\text{DMSO-}d_6$  (400 MHz)

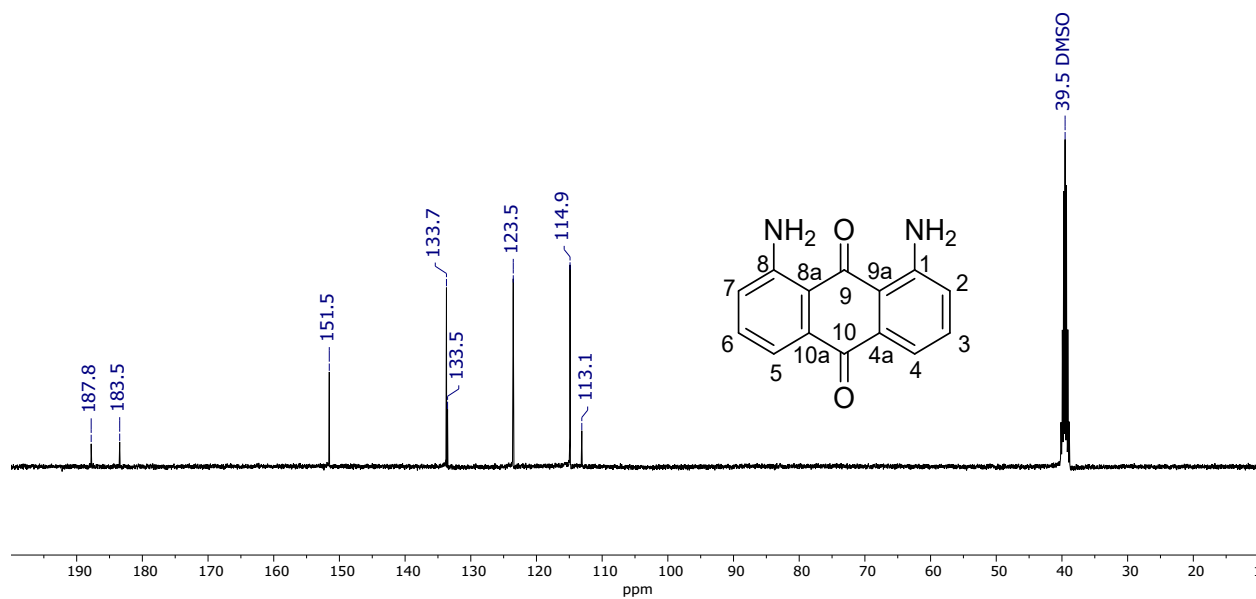

SI 3  $^{13}\text{C}$  NMR spectrum of 1,8-diaminoanthraquinone (**4**) in  $\text{DMSO-}d_6$  (100 MHz)



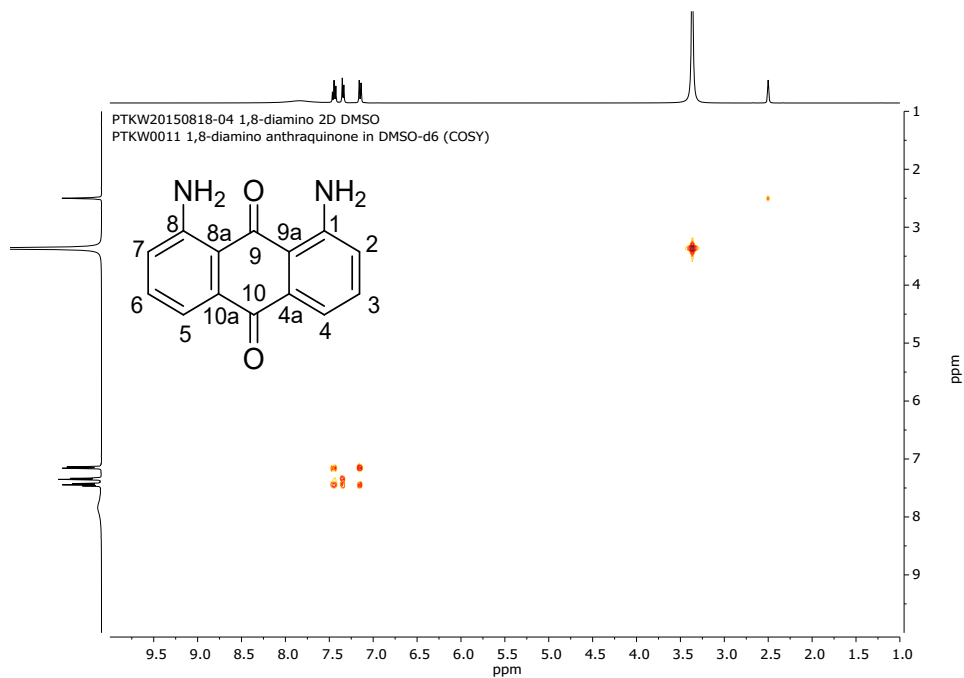

SI 4 COSY  $^1\text{H}$ - $^1\text{H}$  spectrum of 1,8-diaminoanthraquinone (**4**) in DMSO- $d_6$  (400 MHz)

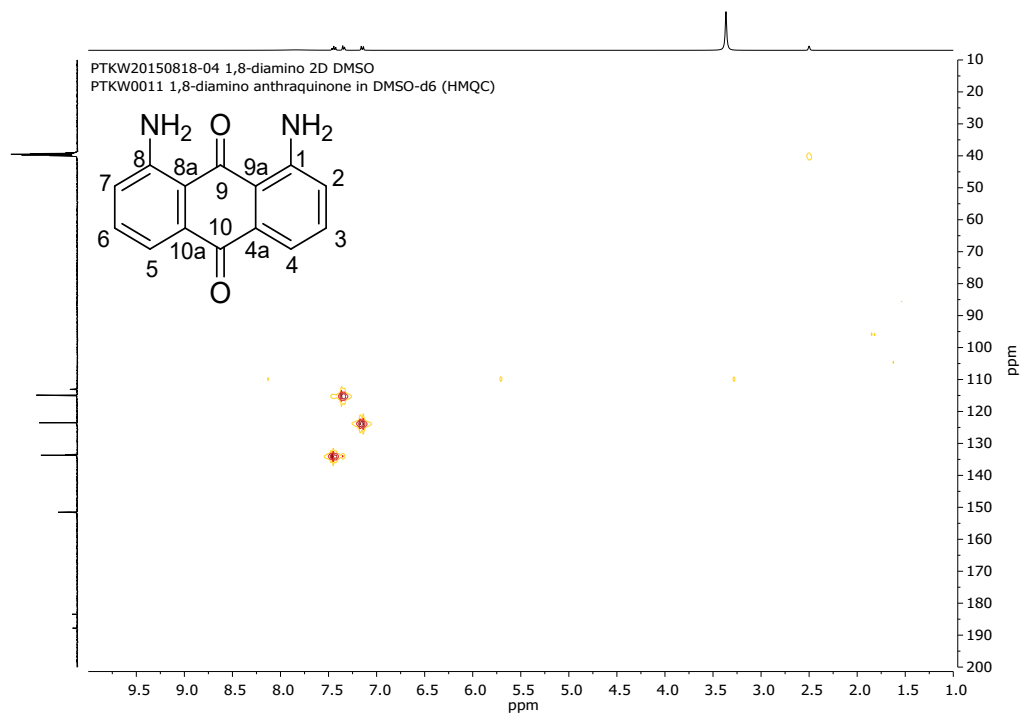

SI 5 HMQC  $^1\text{H}$ - $^{13}\text{C}$  spectrum of 1,8-diaminoanthraquinone (**4**) in DMSO- $d_6$  (400 MHz and 100 MHz for  $^1\text{H}$  and  $^{13}\text{C}$  NMR, respectively)

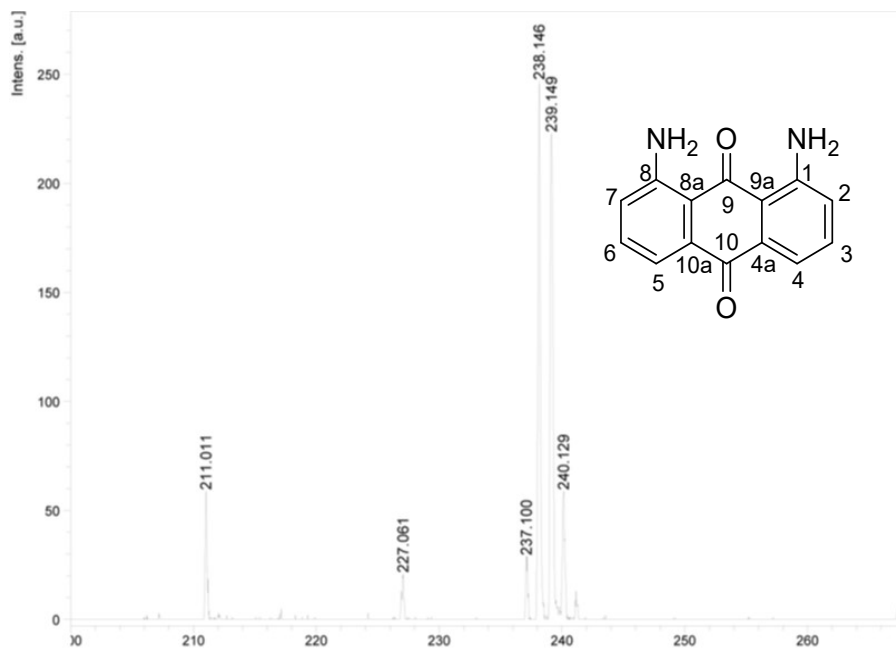

SI 6 MALDI-TOF mass spectrum of 1,8-diaminoanthraquinone (**4**) (Found = 238.146 m/z [M]<sup>+</sup>)

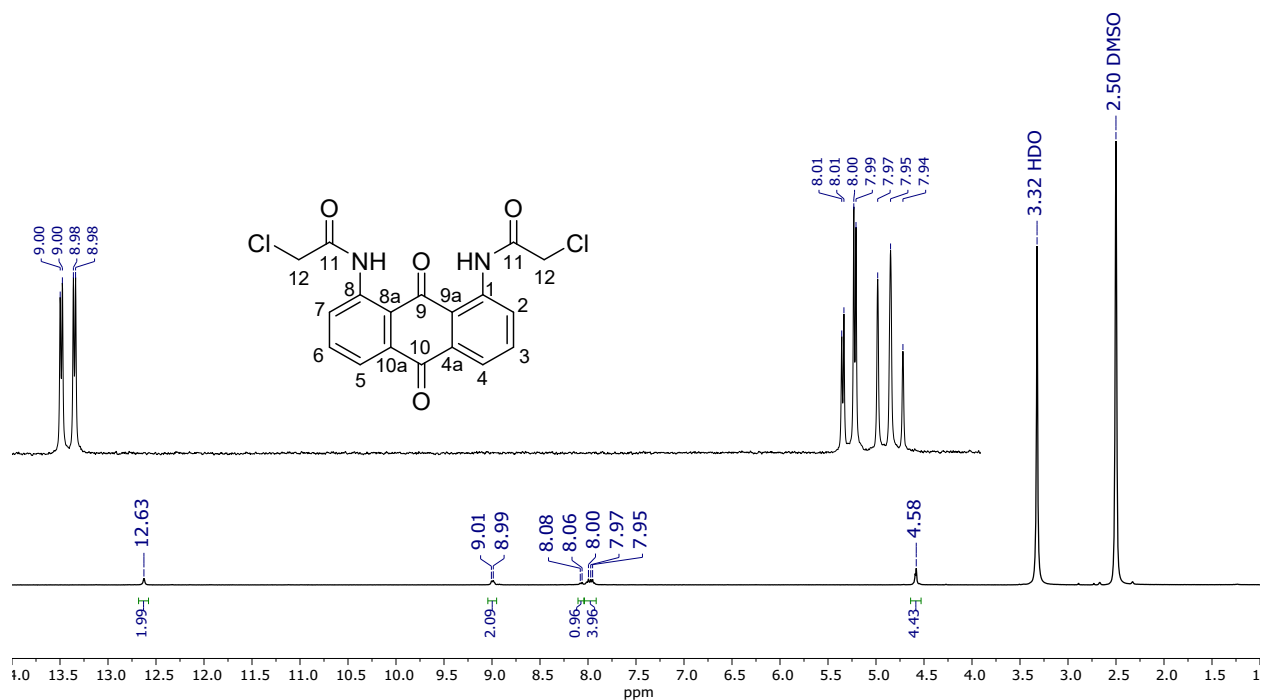

SI 7 Full and partial <sup>1</sup>H NMR spectra of *N,N'*-(9,10-dioxo-9,10-dihydroanthracene-1,8-diyl)bis(2-chloroacetamide) (**6**) in DMSO-*d*<sub>6</sub> (500 MHz)

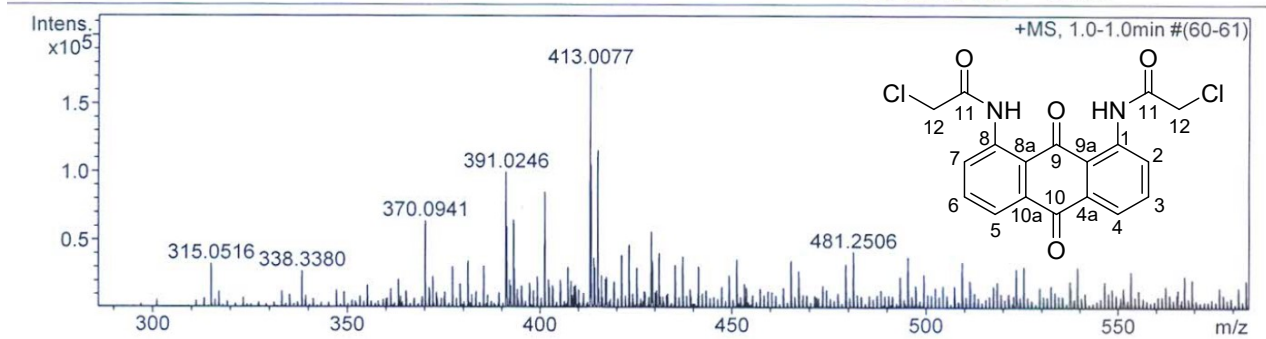

**SI 8** ESI high resolution mass spectrum of *N,N'*-(9,10-dioxo-9,10-dihydroanthracene-1,8-diyl)*bis*(2-chloroacetamide) (**6**) (Found = 413.0077 m/z [M + Na<sup>+</sup>])

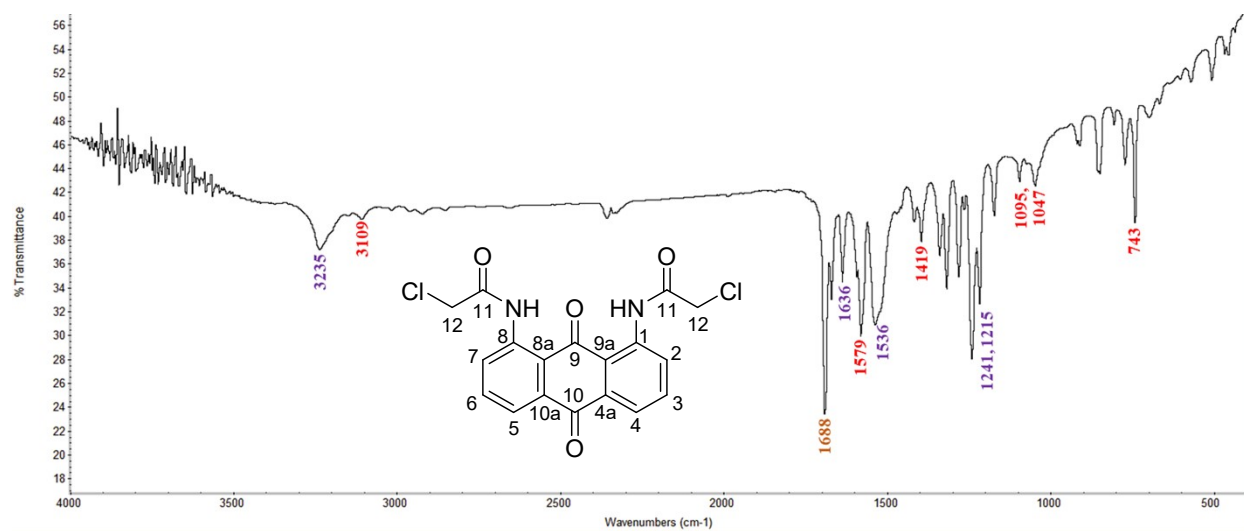

**SI 9** FTIR spectrum of *N,N'*-(9,10-dioxo-9,10-dihydroanthracene-1,8-diyl)*bis*(2-chloroacetamide) (**6**)

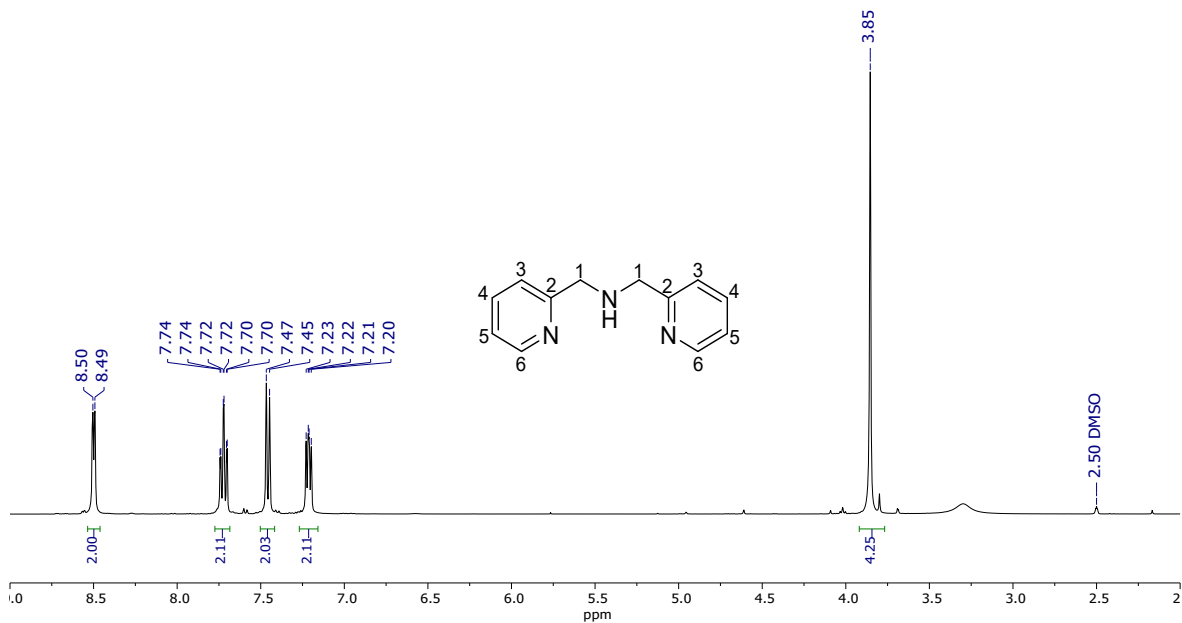

SI 10  $^1\text{H}$  NMR spectrum of *bis*(pyridin-2-ylmethyl)amine (**9**) in  $\text{DMSO-}d_6$  (400 MHz)

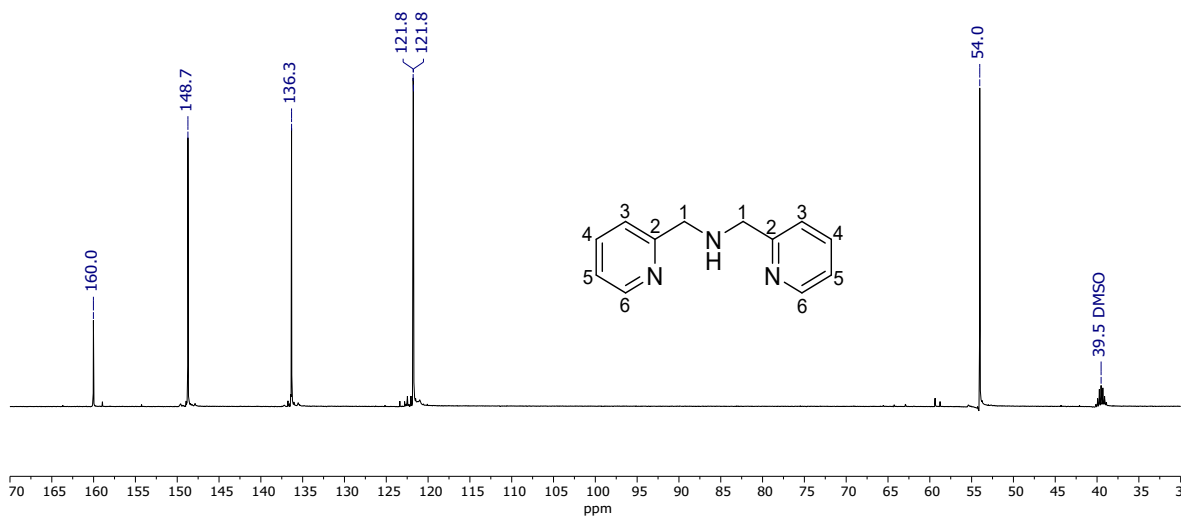

SI 11  $^{13}\text{C}$  NMR spectrum of *bis*(pyridin-2-ylmethyl)amine (**9**) in  $\text{DMSO-}d_6$  (100 MHz)

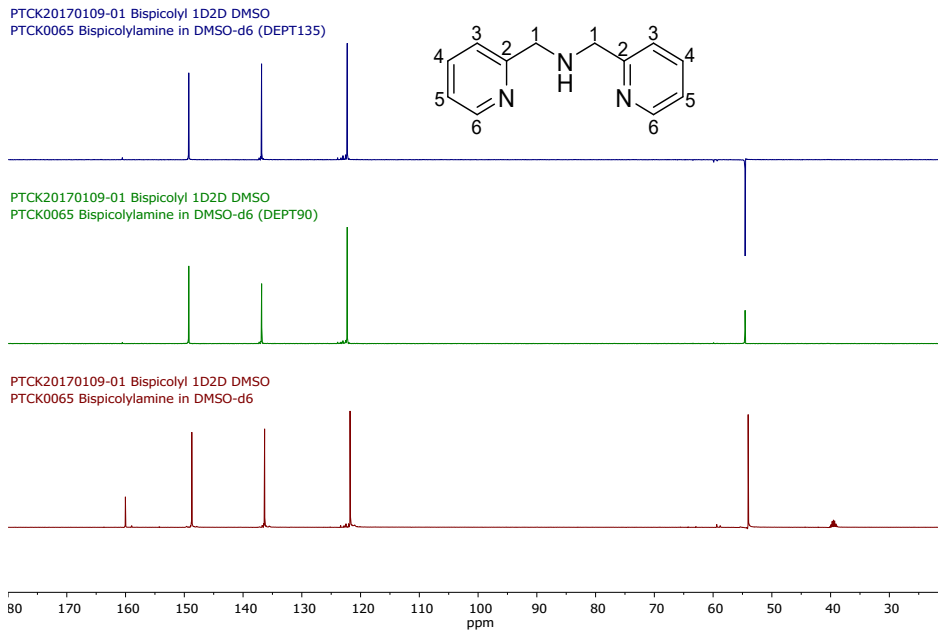

SI 12 DEPT-90 and 135 spectra comparing to <sup>13</sup>C-NMR spectrum of *bis*(pyridin-2-ylmethyl)amine (**9**) in DMSO-*d*<sub>6</sub> (100 MHz)

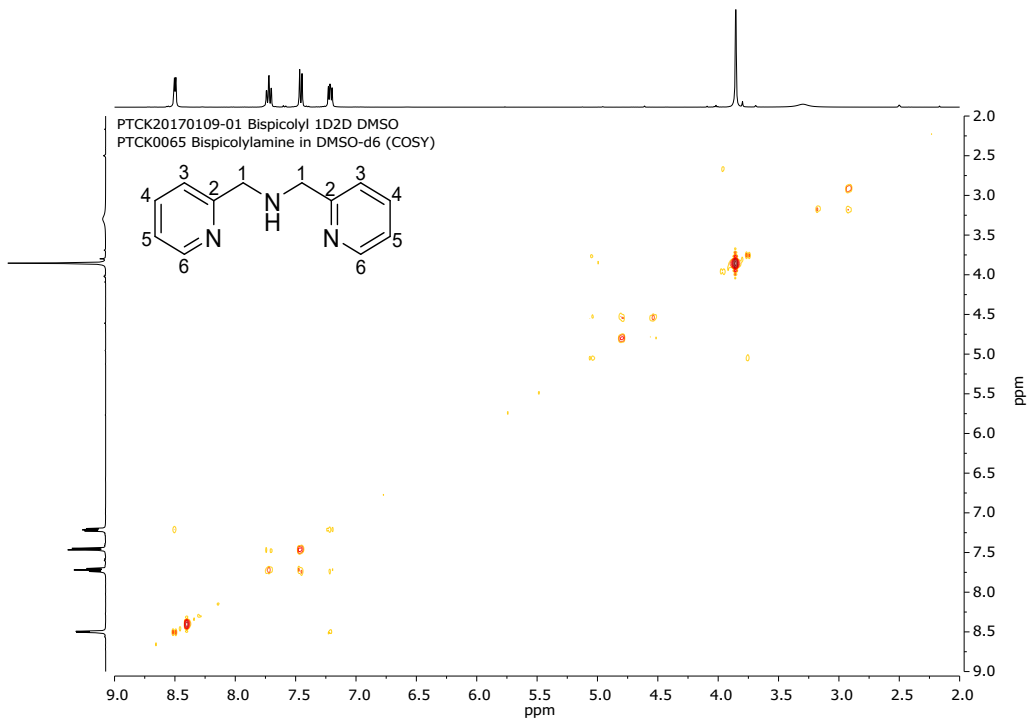

SI 13 COSY <sup>1</sup>H-<sup>1</sup>H spectrum of *bis*(pyridin-2-ylmethyl)amine (**9**) in DMSO-*d*<sub>6</sub> (400 MHz)

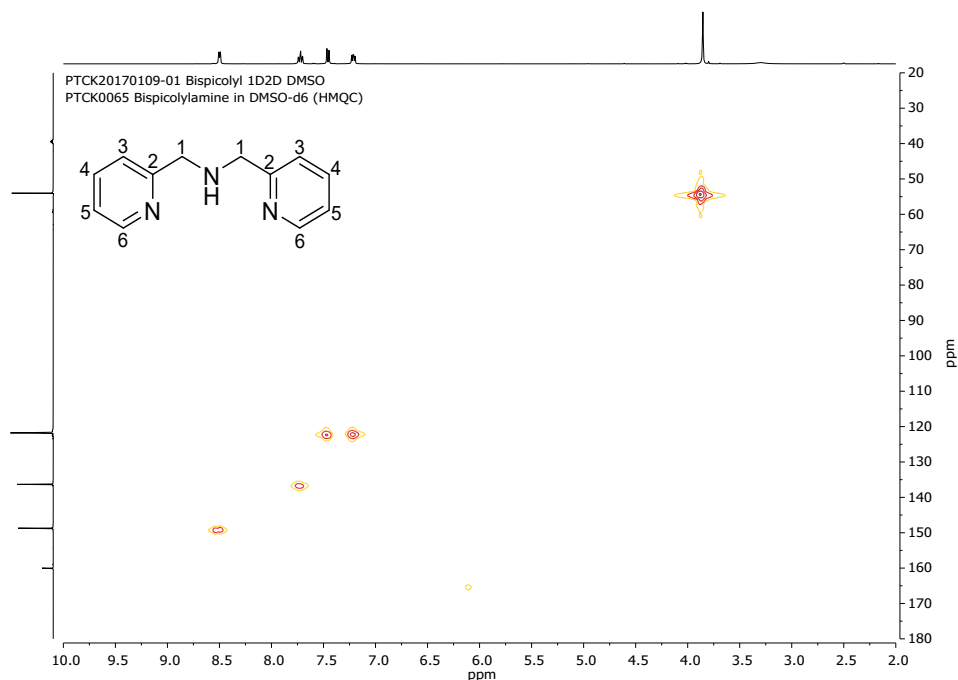

**SI 14** HMQC  $^1\text{H}$ - $^{13}\text{C}$  spectrum of *bis*(pyridin-2-ylmethyl)amine (**9**) in DMSO- $d_6$  (400 MHz and 100 MHz for  $^1\text{H}$  and  $^{13}\text{C}$  NMR, respectively)

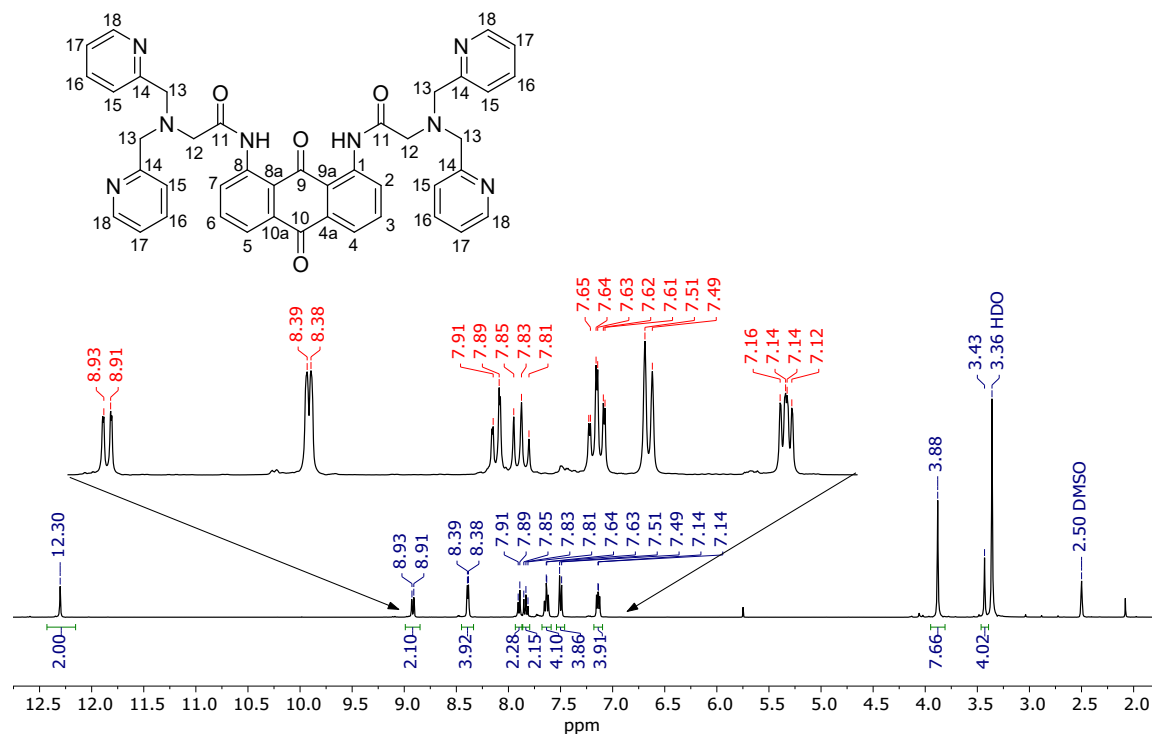

**SI 15** Full and partial  $^1\text{H}$  NMR spectrum of *N,N'*-(9,10-dioxo-9,10-dihydroanthracene-1,8-diyl)bis(2-(bis(pyridin-2-ylmethyl)amino)acetamide) (**1**) in DMSO- $d_6$  (400 MHz)

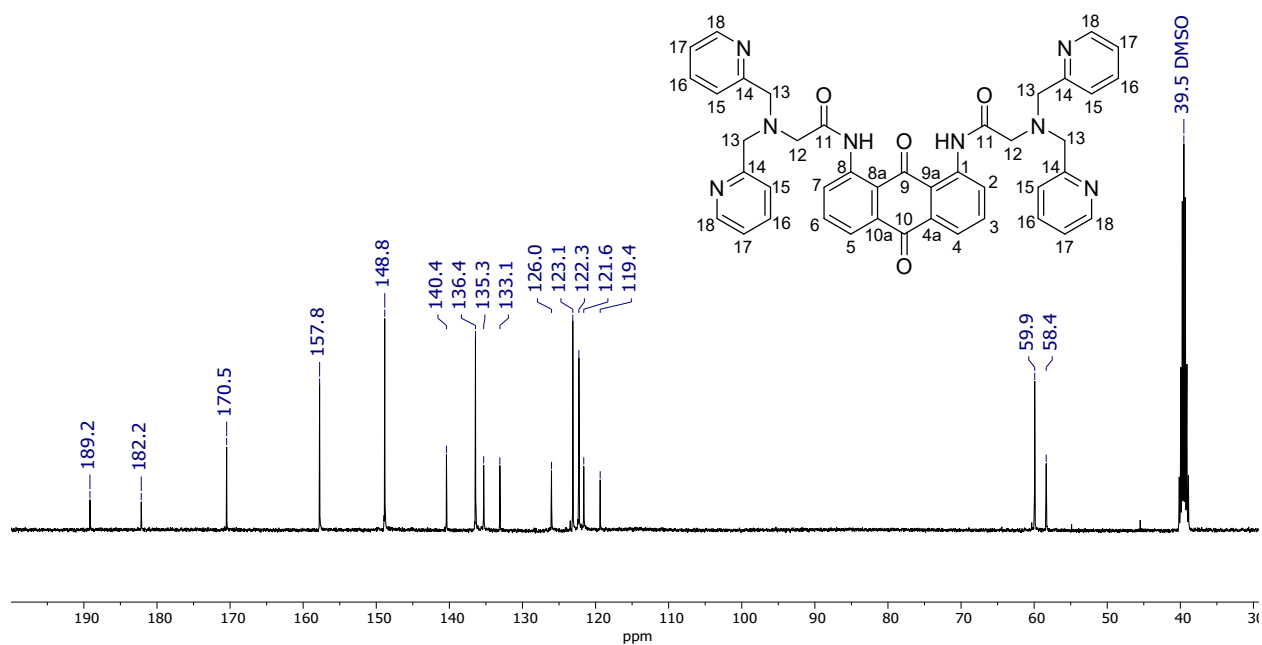

**SI 16**  $^{13}\text{C}$  NMR spectrum of *N,N'*-(9,10-dioxo-9,10-dihydroanthracene-1,8-diyl)*bis*(2-(*bis*(pyridin-2-ylmethyl)amino)acetamide) (**1**) in  $\text{DMSO-}d_6$  (100 MHz)

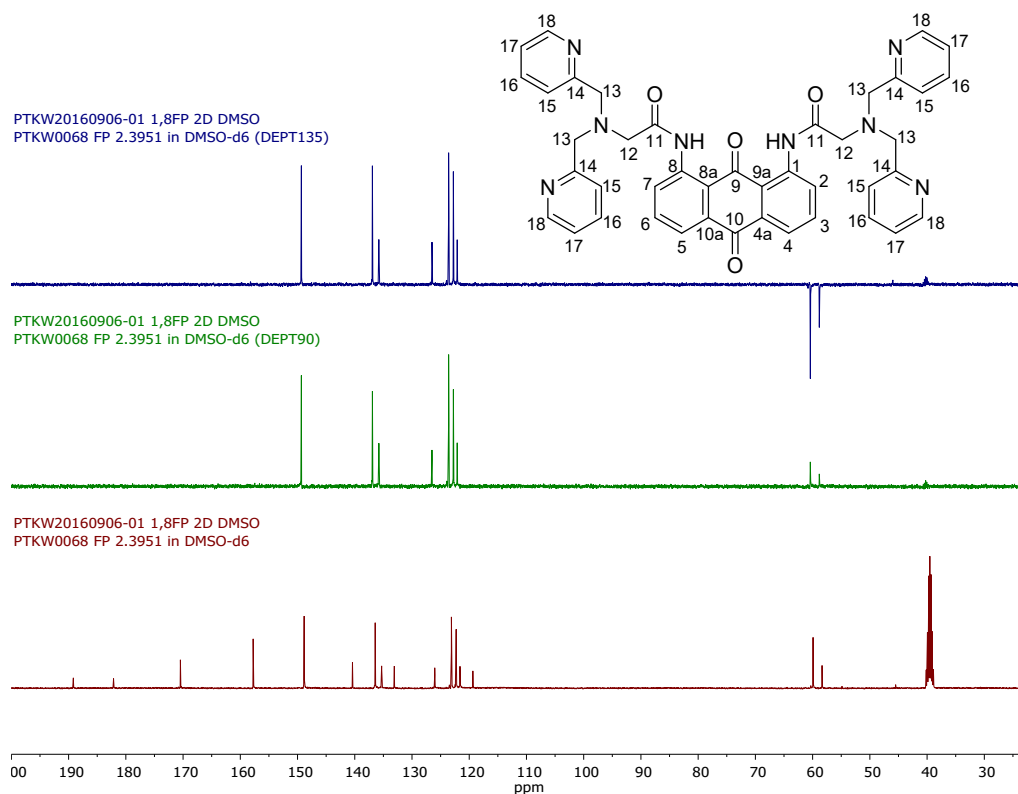

**SI 17** DEPT-90 and 135 spectra comparing to  $^{13}\text{C}$  NMR spectrum of *N,N'*-(9,10-dioxo-9,10-dihydroanthracene-1,8-diyl)*bis*(2-(*bis*(pyridin-2-ylmethyl)amino)acetamide) (**1**) in  $\text{DMSO-}d_6$  (100 MHz)

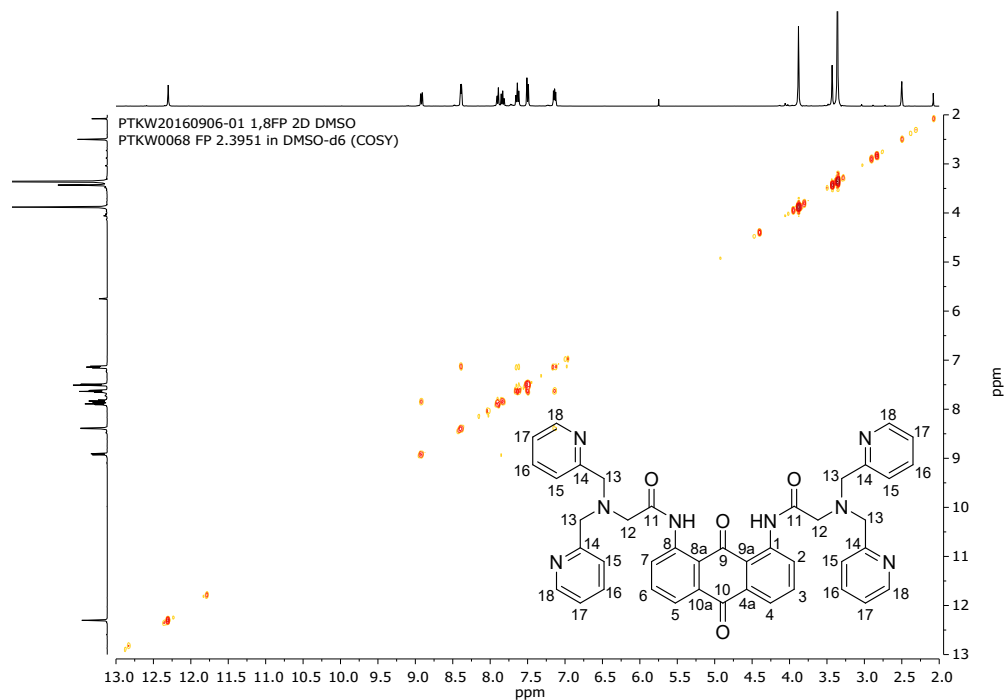

**SI 18** COSY  $^1\text{H}$ - $^1\text{H}$  spectrum of *N,N'*-(9,10-dioxo-9,10-dihydroanthracene-1,8-diyl)bis(2-(bis(pyridin-2-ylmethyl)amino)acetamide) (**1**) in DMSO-*d*<sub>6</sub> (400 MHz)

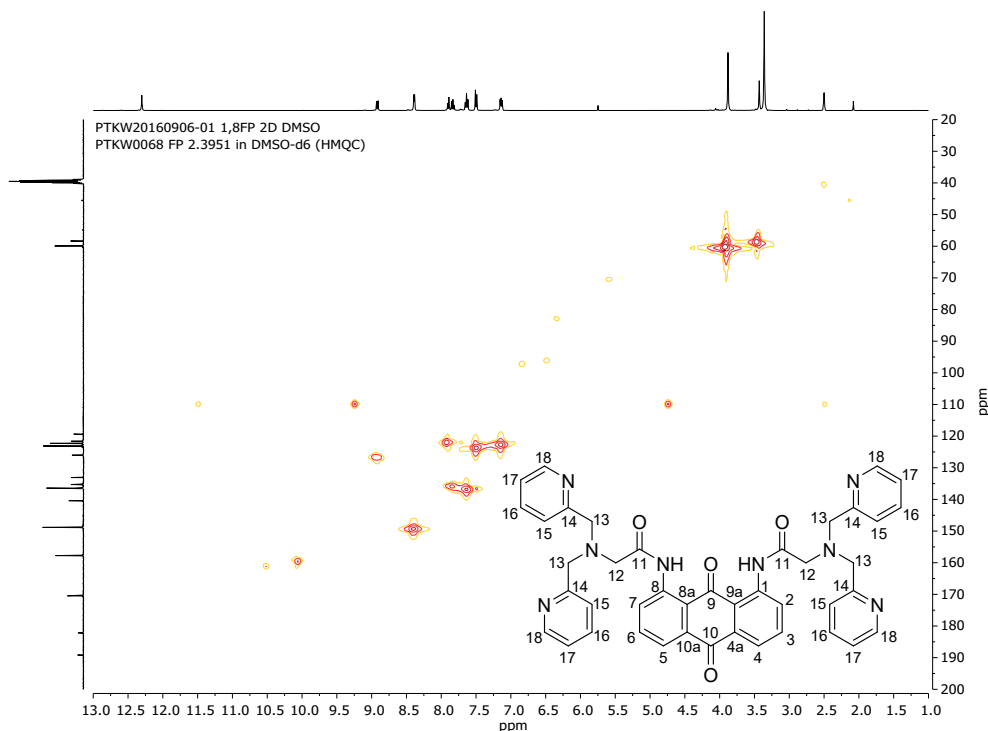

**SI 19** HMQC  $^1\text{H}$ - $^{13}\text{C}$  spectrum of *N,N'*-(9,10-dioxo-9,10-dihydroanthracene-1,8-diyl)bis(2-(bis(pyridin-2-ylmethyl)amino)acetamide) (**1**) in DMSO-*d*<sub>6</sub> (400 MHz and 100 MHz for  $^1\text{H}$  and  $^{13}\text{C}$  NMR, respectively)



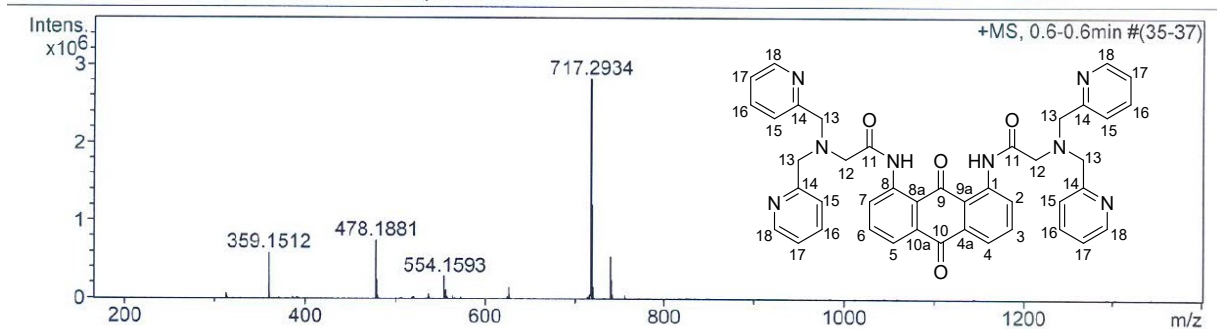

SI 20 ESI high resolution mass spectrum of *N,N'*-(9,10-dioxo-9,10-dihydroanthracene-1,8-diyl)*bis*(2-(bis(pyridin-2-ylmethyl)amino)acetamide) (**1**) (Found = 717.2934 m/z [M + H]<sup>+</sup>)

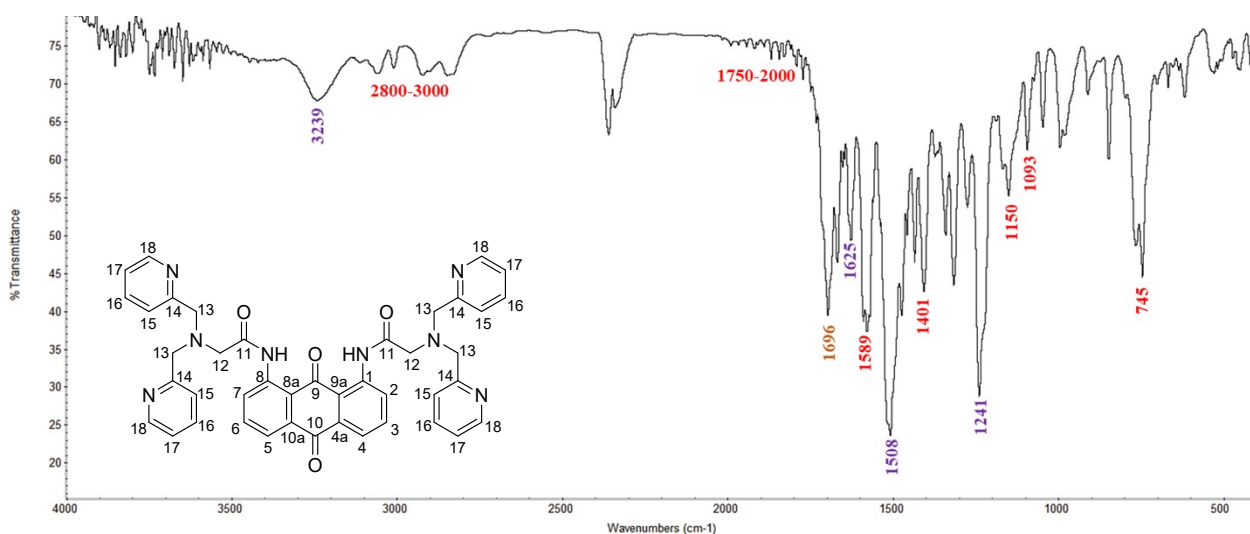

SI 21 FTIR spectrum of *N,N'*-(9,10-dioxo-9,10-dihydroanthracene-1,8-diyl)*bis*(2-(bis(pyridin-2-ylmethyl)amino)acetamide) (**1**)

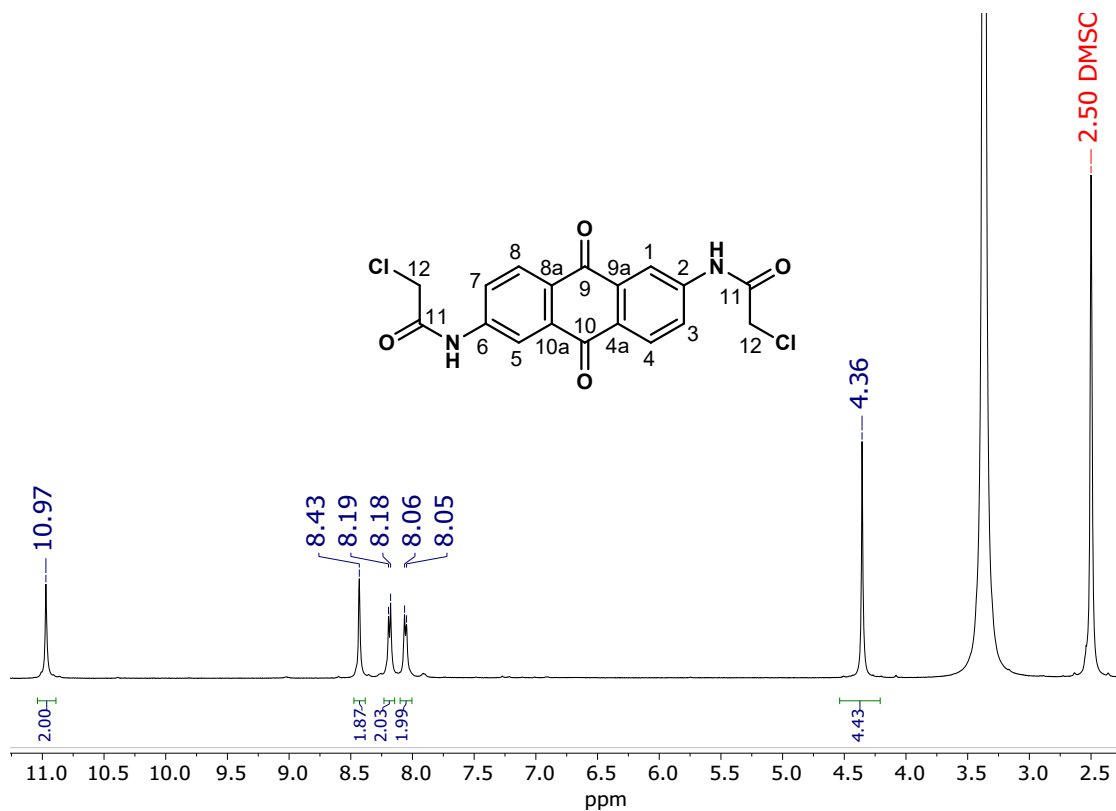

**SI 22** <sup>1</sup>H NMR spectrum of *N,N'*-(9,10-dioxo-9,10-dihydroanthracene-2,6-diyl)bis(2-chloroacetamide) (**11**) in DMSO-*d*<sub>6</sub> (500 MHz)

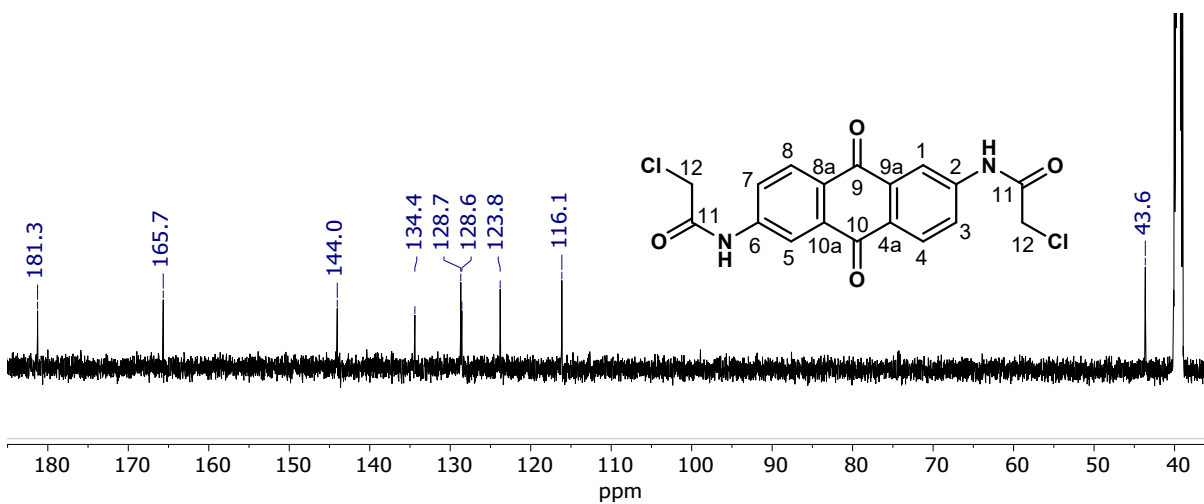

**SI 23** <sup>13</sup>C NMR spectrum of *N,N'*-(9,10-dioxo-9,10-dihydroanthracene-2,6-diyl)bis(2-chloroacetamide) (**11**) in DMSO-*d*<sub>6</sub> (125 MHz)

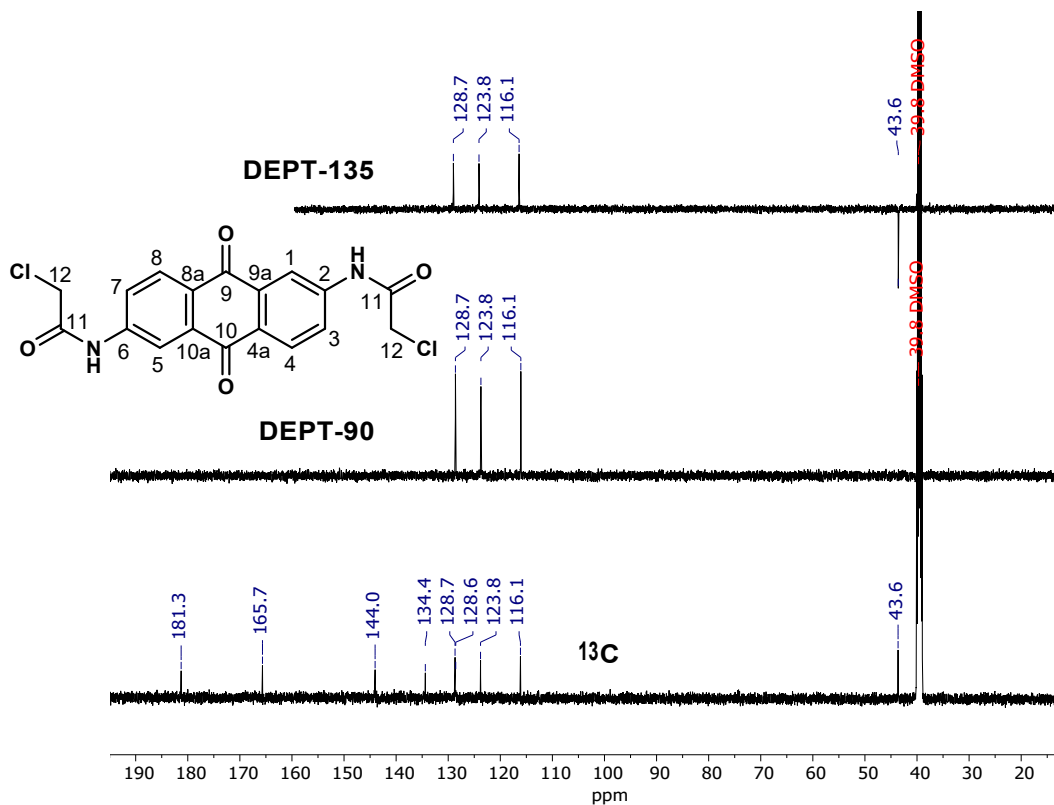

SI 24 DEPT-90 and 135 spectra comparing to <sup>13</sup>C-NMR spectrum of *N,N'*-(9,10-dioxo-9,10-dihydroanthracene-2,6-diyl)bis(2-chloroacetamide) (11) in DMSO-*d*<sub>6</sub> (125 MHz)

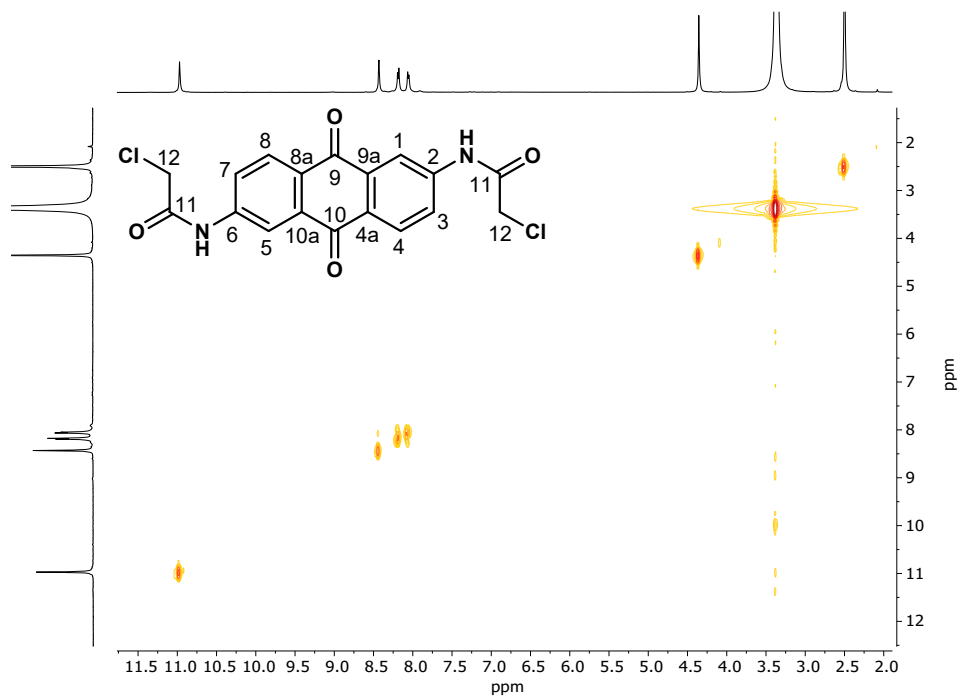

SI 25 COSY <sup>1</sup>H-<sup>1</sup>H spectrum of *N,N'*-(9,10-dioxo-9,10-dihydroanthracene-2,6-diyl)bis(2-chloroacetamide) (11) in DMSO-*d*<sub>6</sub> (500 MHz)

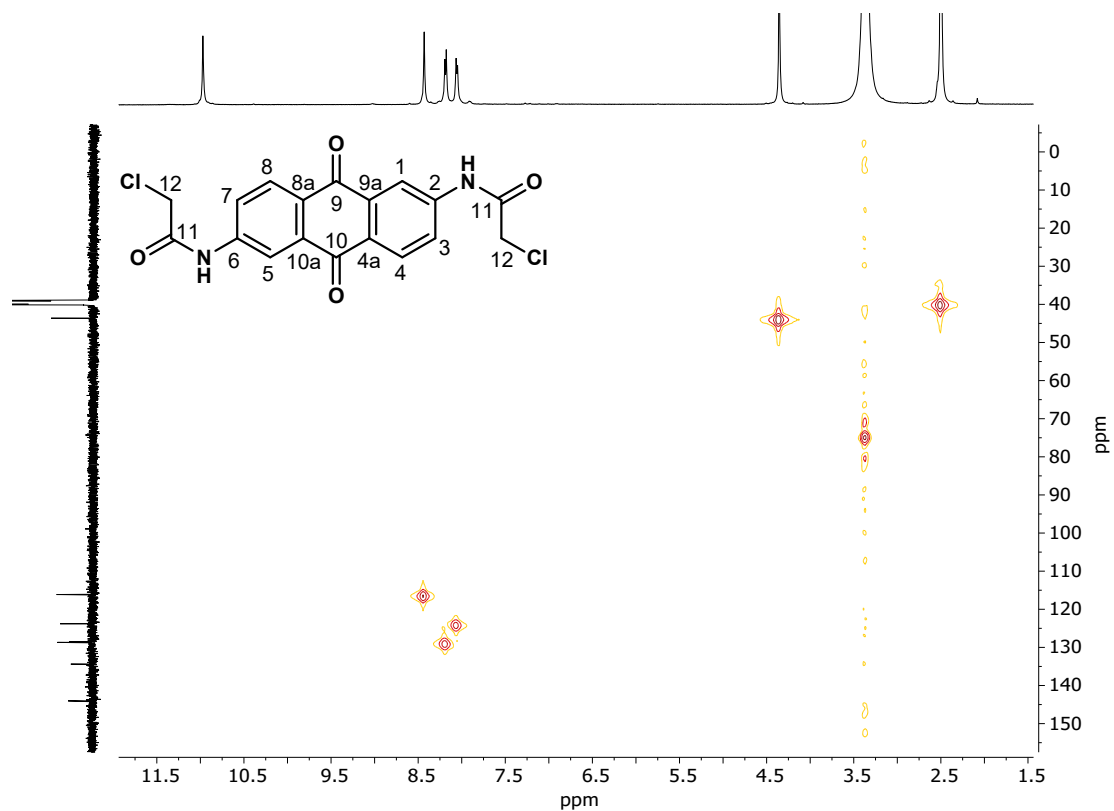

**SI 26** HMQC  $^1\text{H}$ - $^{13}\text{C}$  spectrum of *N,N'*-(9,10-dioxo-9,10-dihydroanthracene-2,6-diyl)*bis*(2-chloroacetamide) (**11**) in  $\text{DMSO-}d_6$  (500 MHz and 125 MHz for  $^1\text{H}$  and  $^{13}\text{C}$  NMR, respectively)

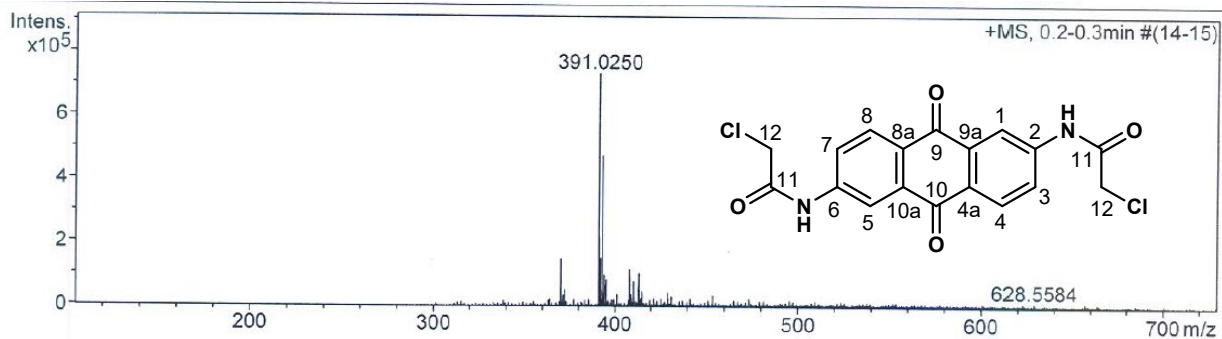

**SI 27** ESI high resolution mass spectrum of *N,N'*-(9,10-dioxo-9,10-dihydroanthracene-2,6-diyl)*bis*(2-chloroacetamide) (**11**) (Found = 391.0250 m/z ( $[\text{M}+\text{H}]^+$ ))

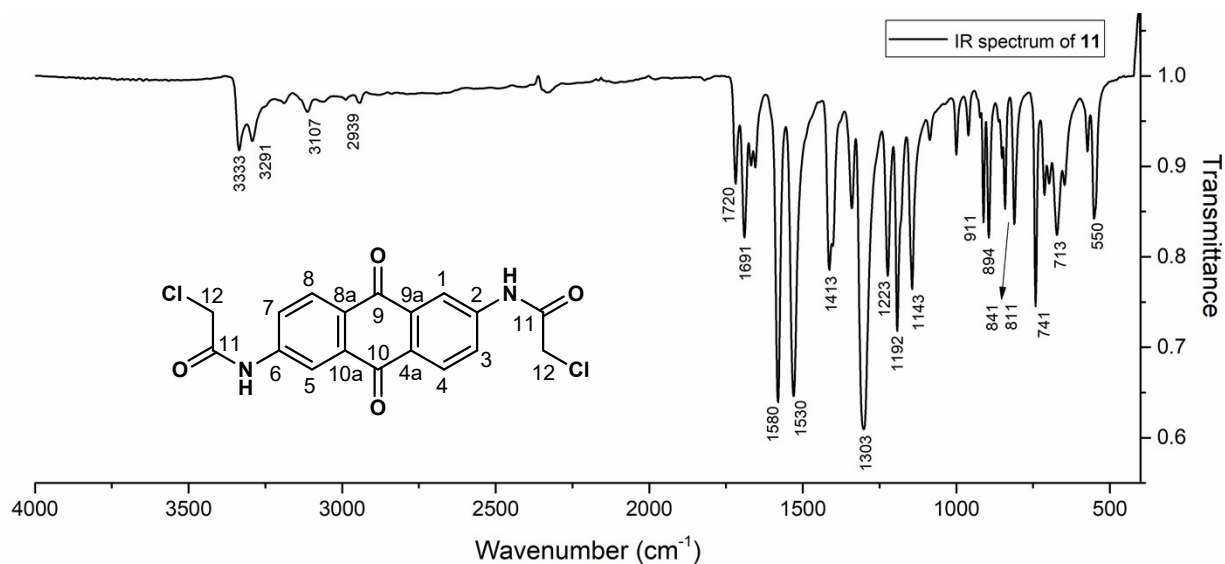

**SI 28** ATR-FTIR spectrum of *N,N'*-(9,10-dioxo-9,10-dihydroanthracene-2,6-diyl)bis(2-chloroacetamide) (**11**)

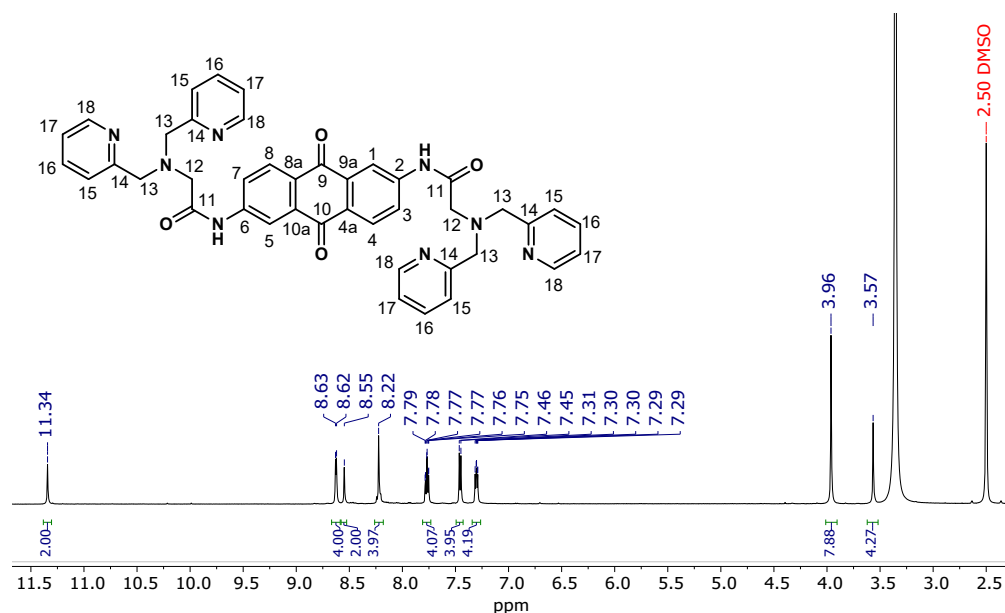

**SI 29**  $^1\text{H}$  NMR spectrum of *N,N'*-(9,10-dioxo-9,10-dihydroanthracene-2,6-diyl)bis(2-(bis(pyridin-2-ylmethyl)amino)acetamide) (**2**) in  $\text{DMSO-}d_6$  (500 MHz)

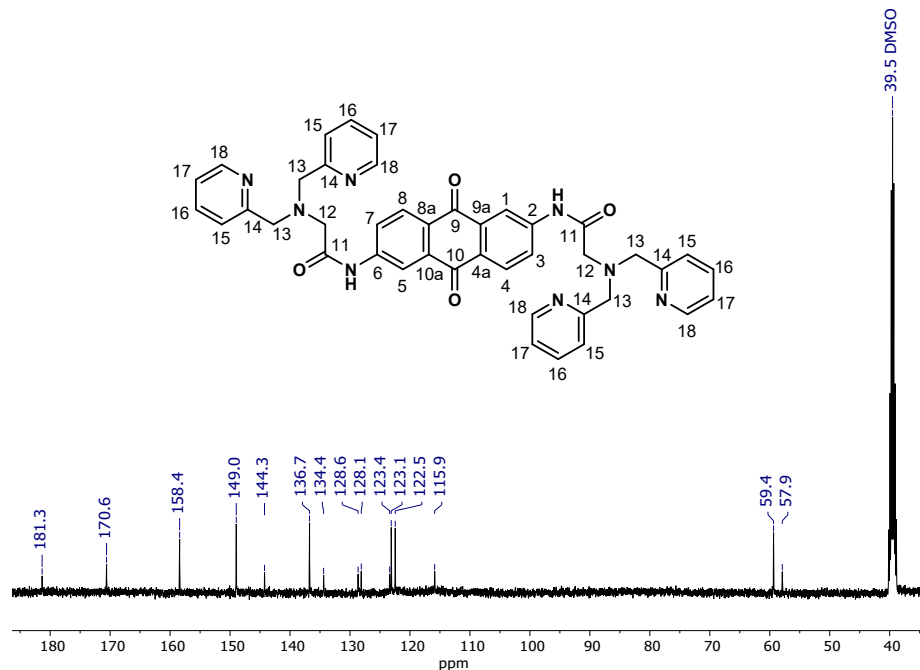

SI 30  $^{13}\text{C}$  NMR spectrum of *N,N'*-(9,10-dioxo-9,10-dihydroanthracene-2,6-diyl)bis(2-(bis(pyridin-2-ylmethyl)amino)acetamide) (2) in  $\text{DMSO-}d_6$  (125 MHz)

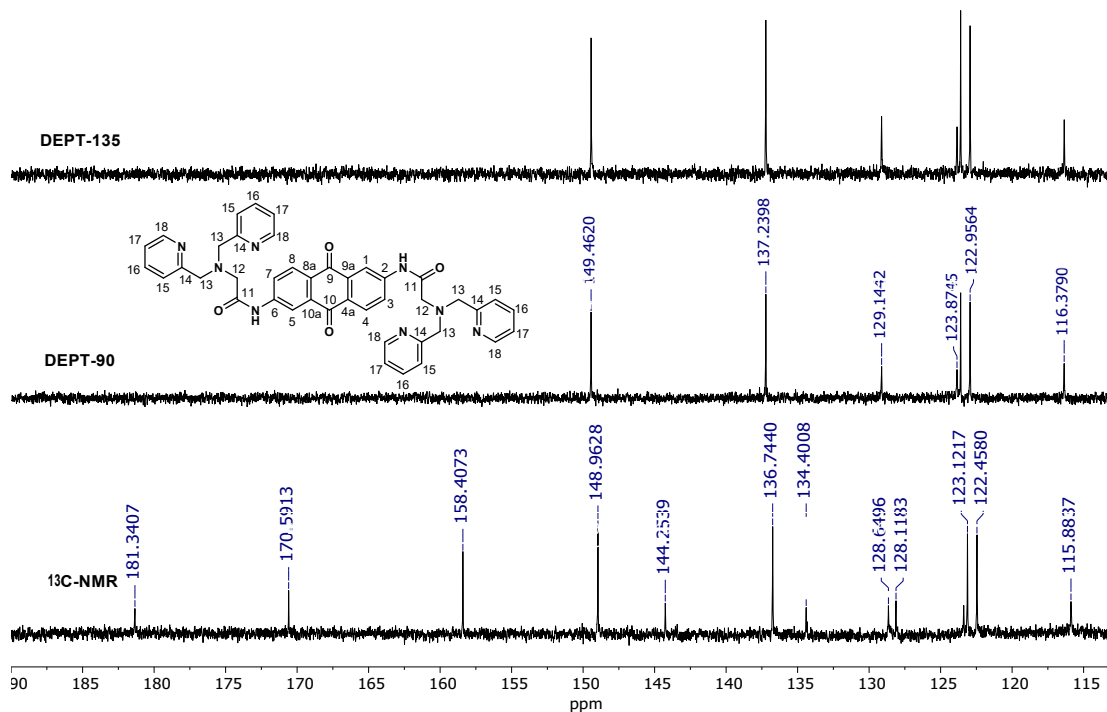

SI 31 DEPT-90 and 135 spectra comparing to  $^{13}\text{C}$ -NMR spectrum of *N,N'*-(9,10-dioxo-9,10-dihydroanthracene-2,6-diyl)bis(2-(bis(pyridin-2-ylmethyl)amino)acetamide) (2) in  $\text{DMSO-}d_6$  (125 MHz)

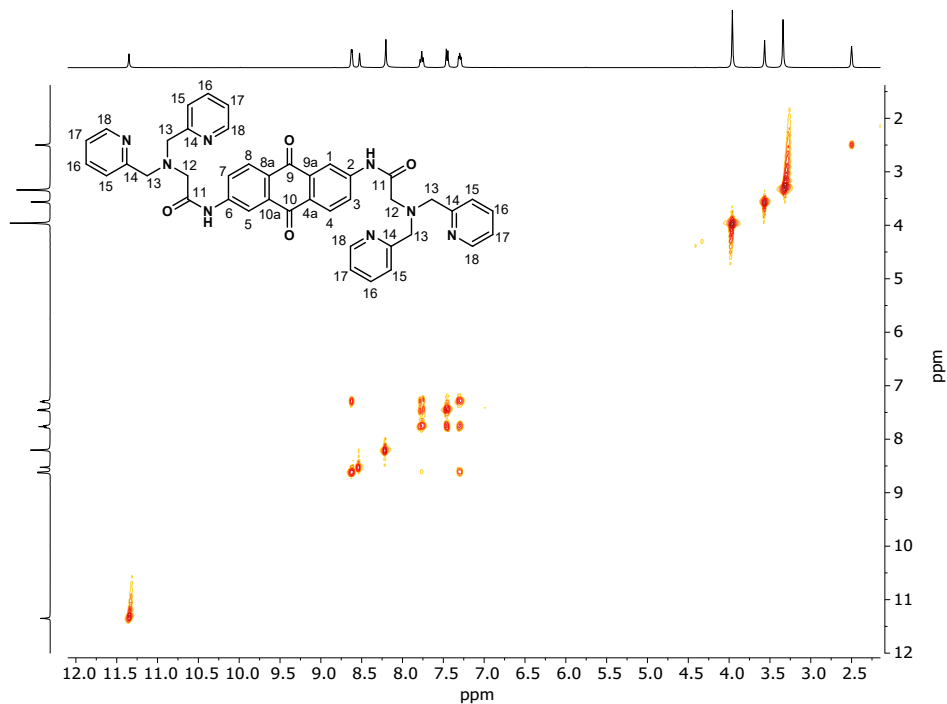

SI 32 COSY  $^1\text{H}$ - $^1\text{H}$  spectrum of *N,N'*-(9,10-dioxo-9,10-dihydroanthracene-2,6-diyl)bis(2-(bis(pyridin-2-ylmethyl)amino)acetamide) (**2**) in  $\text{DMSO-}d_6$  (500 MHz)

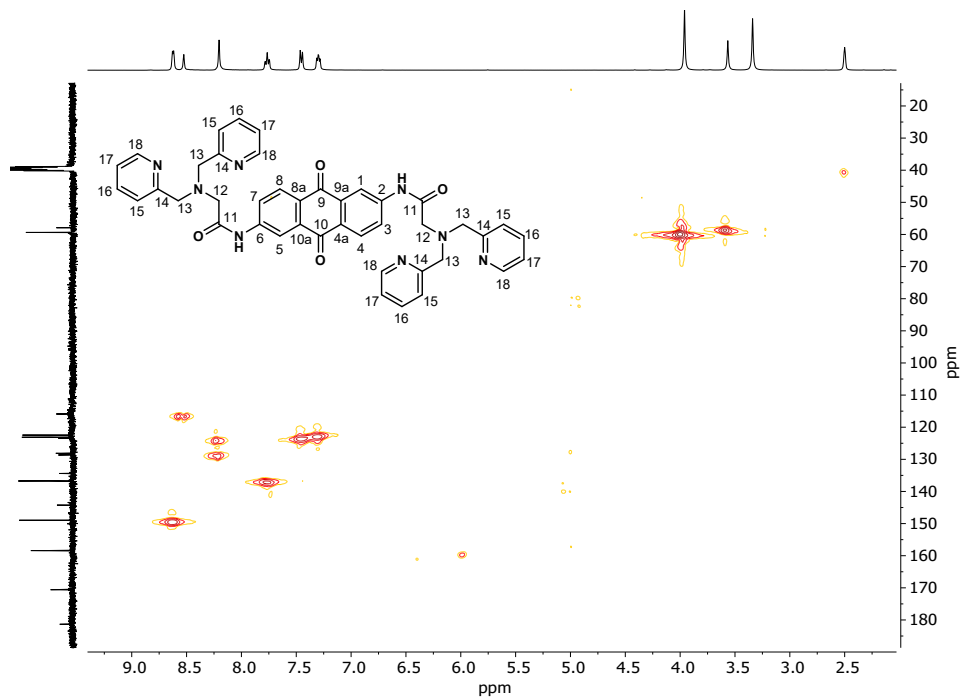

SI 33 HMQC  $^1\text{H}$ - $^{13}\text{C}$  spectrum of *N,N'*-(9,10-dioxo-9,10-dihydroanthracene-2,6-diyl)bis(2-(bis(pyridin-2-ylmethyl)amino)acetamide) (**2**) in  $\text{DMSO-}d_6$  (500 MHz and 125 MHz for  $^1\text{H}$  and  $^{13}\text{C}$  NMR, respectively)

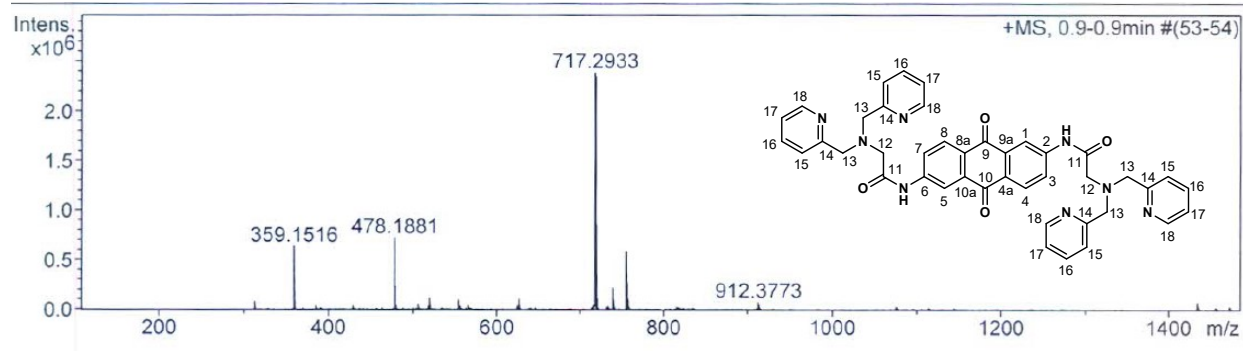

SI 34 ESI high resolution mass of *N,N'*-(9,10-dioxo-9,10-dihydroanthracene-2,6-diyl)*bis*(2-(*bis*(pyridin-2-ylmethyl)amino)acetamide) (**2**) (Found = 717.2933 m/z [M + H]<sup>+</sup>)

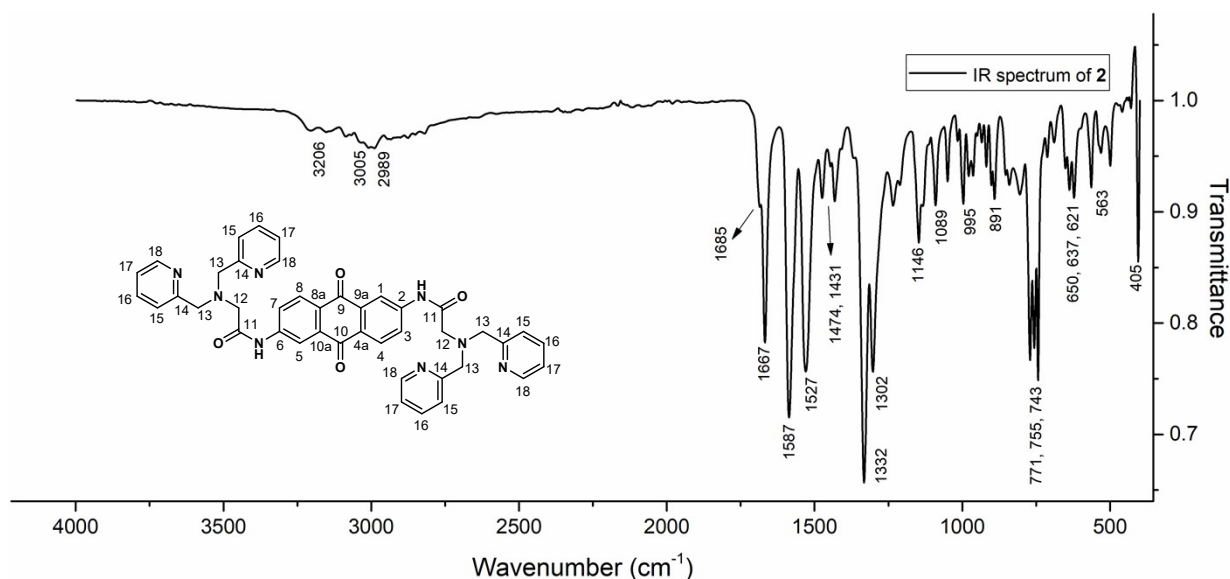

SI 35 ATR-FTIR spectrum of *N,N'*-(9,10-dioxo-9,10-dihydroanthracene-2,6-diyl)*bis*(2-(*bis*(pyridin-2-ylmethyl)amino)acetamide) (**2**)

## References

- (a) R. Shannon, *Acta Crystallogr. A*, 1976, **32**, 751-767; (b) S. Gomes, J.-M. Nedelec, E. Jallot, D. Sheptyakov and G. Renaudin, *Chem. Mater.*, 2011, **23**, 3072-3085; (c) N. Jagannatha and P. Mohan Rao, *Bull. Mater. Sci.*, 1993, **16**, 365-369; (d) S. Marbumrung, K. Wongravee, V. Ruangpornvisuti, G. Tumcharern, T. Tuntulani and B. Tomapatanaget, *Sens. Actuators B Chem.*, 2012, **171-172**, 969-975.
